# Supplementary material for: Assessing Genetic Algorithm-Based Docking Protocols for Prediction of Heparin Oligosaccharide Binding Geometries onto Proteins
Source: MDPI journal article supplement (doi:10.3390/biom13111633), 2023-11-09
Supplement: s1 [file s1]

| #                 | Contents                                                                                           | Pg.     |
|-------------------|----------------------------------------------------------------------------------------------------|---------|
| <b>Figure S1</b>  | Four Major Classes of GAGs                                                                         | S2      |
| <b>Figure S2</b>  | Major IdoA Puckers                                                                                 | S3      |
| <b>Table S1</b>   | Combinatorics of Proteins, Nucleic Acids, and Hp/HS                                                | S4      |
| <b>Table S2</b>   | PDB Survey of $\Phi, \Psi$ for Hp/HS Structures Organized by Acid $\rightarrow$ Amine Linkage Type | S5-S11  |
| <b>Table S3</b>   | PDB Survey of $\Phi, \Psi$ for Hp/HS Structures Organized by Amine $\rightarrow$ Acid Linkage Type | S12-S17 |
| <b>Figure S3</b>  | Comparative structures of two heparin oligosaccharides bound to thrombin.                          | S18     |
| <b>Table S4</b>   | Metadata for all Structures in this Study                                                          | S19     |
| <b>Figure S4</b>  | Visuals for Rigid Dockings                                                                         | S20-S21 |
| <b>Figure S5</b>  | RMSD for Rigid Dockings at 300 GA Runs                                                             | S22     |
| <b>Figure S6</b>  | RMSD for Flexible Dockings at 300 GA Runs                                                          | S23     |
| <b>Figure S7</b>  | Example of GOLD torsional histogram for a semi-rigid docking                                       | S24     |
| <b>Figure S8</b>  | $\Phi, \Psi$ from Semi-Rigid Dockings for two di- and one trisaccharides                           | S25     |
| <b>Figure S9</b>  | $\Phi, \Psi$ from Semi-Rigid Dockings for three tetrasaccharides                                   | S26     |
| <b>Figure S10</b> | $\Phi, \Psi$ from Semi-Rigid Dockings for four pentasaccharides                                    | S27     |
| <b>Figure S11</b> | $\Phi, \Psi$ from Semi-Rigid Dockings for four hexasaccharides                                     | S28     |
| <b>Figure S12</b> | $\Phi, \Psi$ from Semi-Rigid Dockings for two octa- and one hexasaccharide                         | S29     |
| <b>Figure S13</b> | $\Phi, \Psi$ from Flexible Dockings for two di- and one trisaccharides                             | S30     |
| <b>Figure S14</b> | $\Phi, \Psi$ from Flexible Dockings for three tetrasaccharides                                     | S31     |
| <b>Figure S15</b> | $\Phi, \Psi$ from Flexible Dockings for four pentasaccharides                                      | S32     |
| <b>Figure S16</b> | $\Phi, \Psi$ from Flexible Dockings for four hexasaccharides                                       | S33     |
| <b>Figure S17</b> | $\Phi, \Psi$ from Flexible Dockings for two octa- and one hexasaccharide                           | S34     |
| <b>Figure S18</b> | RMSD for Rigid Dockings at 300 GA Runs                                                             | S35     |
| <b>Figure S19</b> | Comparison of changes in torsions from the native following docking                                | S36     |
| <b>Figure S20</b> | Docked Poses from the 3 Protocols for 3 di-, 1 tri- and 2 tetrasaccharides                         | S36     |
| <b>Figure S21</b> | Docked Poses from the 3 Protocols for 1 tetra-, 4 penta- and 1 hexasaccharides                     | S37     |
| <b>Figure S22</b> | Docked Poses from the 3 Protocols for 3 hexa-, 2 octa- and 1 decasaccharides                       | S38     |

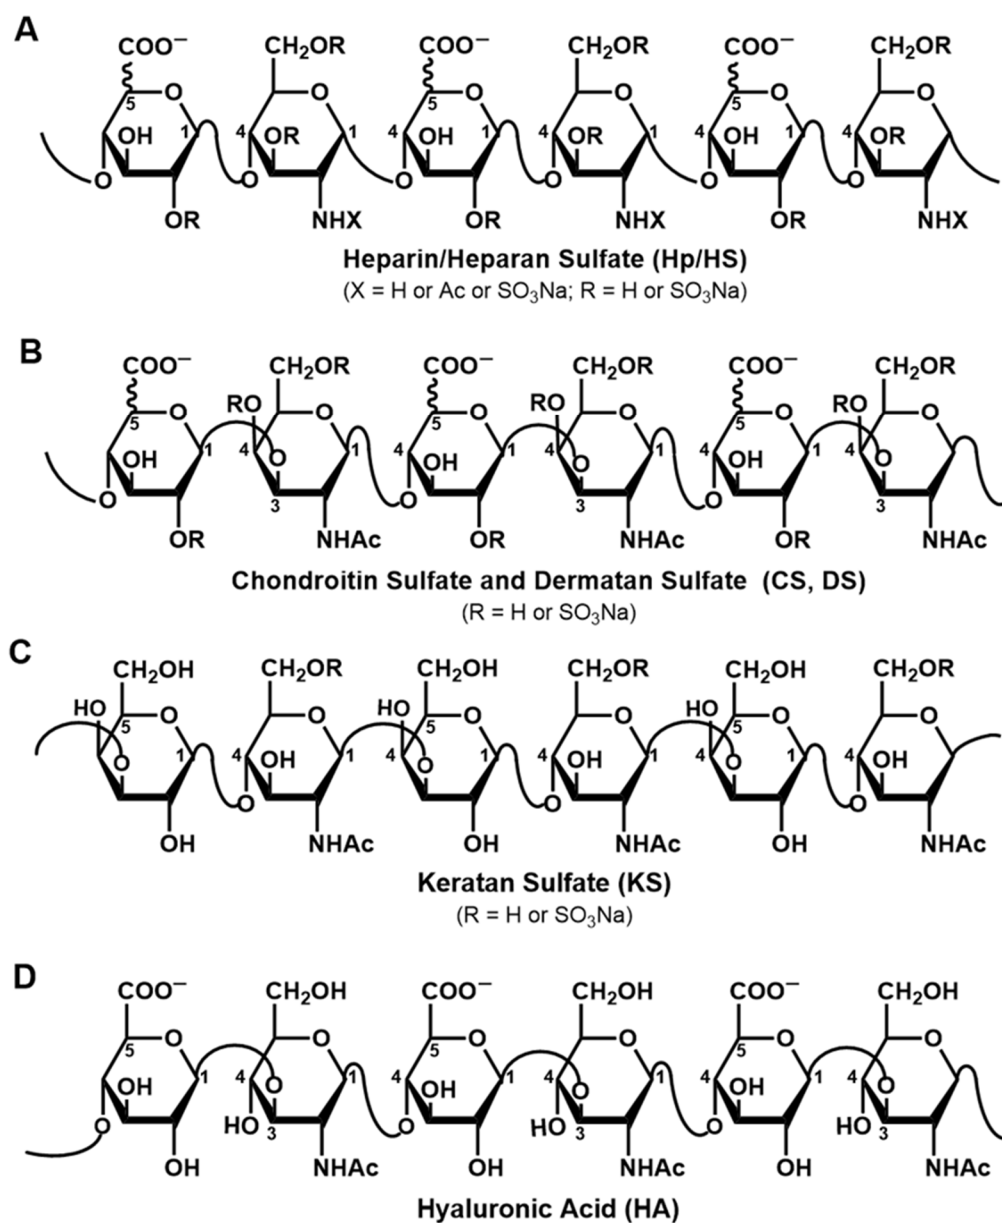

**Figure S1.** Four major classes of GAGs shown as Haworth projections. Red and blue indicates the two alternate linkages in each GAG. The curly bond between C5 and C6 in Hp/HS indicates the presence of either IdoA or GlcA in the disaccharide. In Hp/HS, R<sub>1</sub> = H or SO<sub>3</sub>Na and R<sub>2</sub> = Ac or SO<sub>3</sub>Na. In all other GAGs, R = H or SO<sub>3</sub>Na.

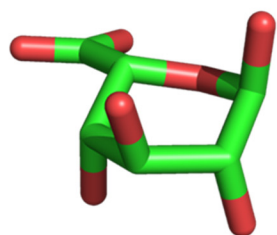

IdoA( ${}^1C_4$ )

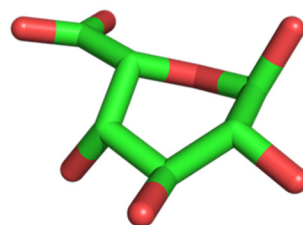

IdoA( ${}^2S_0$ )

**Figure S2.** Two of the many possible conformations of iduronic acid (IdoA). Shown are  ${}^1C_4$  and  ${}^2S_0$  puckers, which typically are most populated in solution.

**Table S1.** Theoretical number of possible sequences/topologies for a hexameric repeating building block of biopolymers generated from nucleotides, amino acids and disaccharides. Note: The number of common building blocks increase when two most preferred puckers  ${}^1C_4$  and  ${}^2S_0$  are factored in.

| Biopolymer    | Number of Building Blocks                        | Number of Building Block Repeats | Combinatorial            |
|---------------|--------------------------------------------------|----------------------------------|--------------------------|
| Nucleic Acids | 4                                                | 6                                | $4^6 = 4,096$            |
| Peptides      | 20                                               | 6                                | $20^6 = 64,000,000$      |
| Hp/HS         | 48 <sup>#</sup>                                  | 6                                | $48^6 = 12,230,590,464$  |
| Hp/HS         | 72 including IdoA in ${}^1C_4$ & ${}^2S_0$ forms | 6                                | $72^6 = 139,314,069,504$ |

<sup>#</sup> Theoretical number of disaccharide building blocks possible for Hp/HS biopolymers.



**Table S2.** Phi and psi corresponding to different glycosidic linkages of Hp/HS complexes with diverse proteins obtained from the protein data bank (PDB). Shown below are  $\Phi$  and  $\Psi$  values for acid – amine linkages (UA→GlcN).

| PDB  | Length | Sequence                                   | Linkage Type     | Linkage Position | $\Phi$ | $\Psi$ | Xray/NMR |
|------|--------|--------------------------------------------|------------------|------------------|--------|--------|----------|
| 3B9F | 2      | IdoA2S(2SO)-GlcNS                          | IdoA-GlcN        | 1                | -67.8  | -112.1 | Xray     |
| 1U4L | 2      | $\Delta$ UA2S-GlcNS6S                      | $\Delta$ UA-GlcN | 1                | -96.1  | 64.1   | Xray     |
| 1U4M | 2      | $\Delta$ UA2S-GlcNS                        | $\Delta$ UA-GlcN | 1                | -97.5  | 66     | Xray     |
| 3OGX | 2      | $\Delta$ UA2S-GlcNS6S                      | $\Delta$ UA-GlcN | 1                | -112.4 | -125.4 | Xray     |
| 5DNF | 3      | GlcNS6S-IdoA2S(1C4)-GlcNS6S                | IdoA-GlcN        | 1                | -38.9  | -85.3  | Xray     |
| 3E7J | 4      | $\Delta$ UA-GlcNAc-GlcA-GlcNAc             | GlcA-GlcN        | 1                | -89.9  | -112.8 | Xray     |
| 1BFB | 4      | $\Delta$ UA2S-GlcNS6S-IdoA2S(1C4)-GlcNS6S  | IdoA-GlcN        | 1                | -62    | -97.8  | Xray     |
| 2HYU | 4      | $\Delta$ UA2S-GlcNS6S-IdoA2S(1C4)-GlcNS6S  | IdoA-GlcN        | 1                | -110.2 | 61.4   | Xray     |
| 2VRA | 4      | IdoA2S(2SO)-GlcNS6S-IdoA2S(1C4)-GlcNS6S    | IdoA-GlcN        | 1                | -90.8  | -98.9  | Xray     |
| 3QMK | 4      | IdoA2S(1C4)-GlcNS6S-IdoA2S(1C4)-GlcNS6S    | IdoA-GlcN        | 1                | -76.5  | -103.7 | Xray     |
| 5E9C | 4      | $\Delta$ UA2S-GlcNS6S-IdoA-GlcNS6S         | IdoA-GlcN        | 1                | -24.7  | -118.1 | Xray     |
| 1T8U | 4      | $\Delta$ UA2S-GlcNS6S-IdoA2S(2SO)-GlcNS6S  | IdoA-GlcN        | 1                | -77.2  | -133.5 | Xray     |
| 2VRA | 4      | IdoA2S(2SO)-GlcNS6S-IdoA2S(1C4)-GlcNS6S    | IdoA-GlcN        | 3                | -81.6  | -145.2 | Xray     |
| 3QMK | 4      | IdoA2S(1C4)-GlcNS6S-IdoA2S(1C4)-GlcNS6S    | IdoA-GlcN        | 3                | -63.5  | -108.9 | Xray     |
| 1BFB | 4      | $\Delta$ UA2S-GlcNS6S-IdoA2S(1C4)-GlcNS6S  | $\Delta$ UA-GlcN | 3                | -78.8  | -107.1 | Xray     |
| 2HYU | 4      | $\Delta$ UA2S-GlcNS6S-IdoA2S(1C4)-GlcNS6S  | $\Delta$ UA-GlcN | 3                | -62.2  | -114.6 | Xray     |
| 5E9C | 4      | $\Delta$ UA2S-GlcNS6S-IdoA-GlcNS6S         | $\Delta$ UA-GlcN | 3                | -70.6  | -112.1 | Xray     |
| 1T8U | 4      | $\Delta$ UA2S-GlcNS6S-IdoA2S(2SO)-GlcNS6S  | $\Delta$ UA-GlcN | 3                | -84    | -113.5 | Xray     |
| 3E7J | 4      | $\Delta$ UA-GlcNAc-GlcA-GlcNAc             | $\Delta$ UA-GlcN | 3                | -45    | -122.8 | Xray     |
| 2GD4 | 5      | GlcNS6S-GlcA-GlcNS3S6S-IdoA2S(2SO)-GlcNS6S | IdoA-GlcN        | 1                | -67.5  | -108.7 | Xray     |
| 4X7R | 5      | GlcNS6S-GlcA-GlcNS3S6S-IdoA2S(2SO)-GlcNS6S | IdoA-GlcN        | 1                | -65.2  | -106.8 | Xray     |
| 4R9W | 5      | GlcNS6S-GlcA-GlcNS3S6S-IdoA2S(2SO)-GlcNS6S | IdoA-GlcN        | 1                | -76.9  | -139.2 | Xray     |

| PDB  | Length | Sequence                                                      | Linkage Type     | Linkage Position | $\Phi$ | $\Psi$ | Xray/NMR |
|------|--------|---------------------------------------------------------------|------------------|------------------|--------|--------|----------|
| 3EVJ | 5      | GlcNS6S-GlcA-GlcNS3S6S-IdoA2S(2SO)-GlcNS6S                    | IdoA-GlcN        | 1                | -67.9  | -110.9 | Xray     |
| 1GMN | 5      | IdoA2S(2SO)-GlcNS6S-IdoA2S(1C4)-GlcNS6S-IdoA2S(2SO)           | IdoA-GlcN        | 2                | -72.8  | -95.5  | Xray     |
| 2HYV | 5      | $\Delta$ UA2S-GlcNS6S-IdoA2S(1C4)-GlcNS6S-IdoA2S(1C4)         | IdoA-GlcN        | 2                | -120.2 | -160.8 | Xray     |
| 3DY0 | 5      | IdoA(2SO)-GlcNS6S-IdoA2S(1C4)-GlcNS6S-IdoA(1C4)               | IdoA-GlcN        | 2                | -81.4  | -105.9 | Xray     |
| 7B8H | 5      | IdoA2S(1C4)-GlcNS6S-IdoA2S(1C4)-GlcNS6S-IdoA2S(1C4)           | IdoA-GlcN        | 2                | -80.1  | -109.7 | Xray     |
| 2GD4 | 5      | GlcNS6S-GlcA-GlcNS3S6S-IdoA2S(2SO)-GlcNS6S                    | GlcA-GlcN        | 3                | -84.3  | -121   | Xray     |
| 4X7R | 5      | GlcNS6S-GlcA-GlcNS3S6S-IdoA2S(2SO)-GlcNS6S                    | GlcA-GlcN        | 3                | -94.6  | -100.5 | Xray     |
| 4R9W | 5      | GlcNS6S-GlcA-GlcNS3S6S-IdoA2S(2SO)-GlcNS6S                    | GlcA-GlcN        | 3                | -70.3  | -105.1 | Xray     |
| 3EVJ | 5      | GlcNS6S-GlcA-GlcNS3S6S-IdoA2S(2SO)-GlcNS6S                    | GlcA-GlcN        | 3                | -71.1  | -122.7 | Xray     |
| 1GMN | 5      | IdoA2S(2SO)-GlcNS6S-IdoA2S(1C4)-GlcNS6S-IdoA2S(2SO)           | IdoA-GlcN        | 4                | -79.6  | -87.4  | Xray     |
| 3DY0 | 5      | IdoA(2SO)-GlcNS6S-IdoA2S(1C4)-GlcNS6S-IdoA(1C4)               | IdoA-GlcN        | 4                | -97.6  | -85.2  | Xray     |
| 7B8H | 5      | IdoA2S(1C4)-GlcNS6S-IdoA2S(1C4)-GlcNS6S-IdoA2S(1C4)           | IdoA-GlcN        | 4                | -72.9  | -108.1 | Xray     |
| 2HYV | 5      | $\Delta$ UA2S-GlcNS6S-IdoA2S(1C4)-GlcNS6S-IdoA2S(1C4)         | $\Delta$ UA-GlcN | 4                | -62.1  | -118.3 | Xray     |
| 1BFC | 6      | $\Delta$ UA2S-GlcNS6S-IdoA2S(1C4)-GlcNS6S-IdoA2S(2SO)-GlcNS6S | IdoA-GlcN        | 1                | -74.7  | -96.3  | Xray     |
| 1XT3 | 6      | $\Delta$ UA2S-GlcNS6S-IdoA2S(1C4)-GlcNS6S-IdoA2S(2SO)-GlcNS6S | IdoA-GlcN        | 1                | -65.1  | -160.7 | Xray     |
| 3MKP | 6      | IdoA2S(2SO)-GlcNS6S-IdoA2S(1C4)-GlcNS6S-IdoA2S(1C4)-GlcNS6S   | IdoA-GlcN        | 1                | -96.8  | -135.4 | Xray     |
| 3OJV | 6      | $\Delta$ UA2S-GlcNS6S-IdoA2S(1C4)-GlcNS6S-IdoA2S(1C4)-GlcNS6S | IdoA-GlcN        | 1                | 4.5    | -99.1  | Xray     |

| PDB  | Length | Sequence                                                            | Linkage Type | Linkage Position | $\Phi$ | $\Psi$ | Xray/NMR |
|------|--------|---------------------------------------------------------------------|--------------|------------------|--------|--------|----------|
| 4AK2 | 6      | IdoA2S(1C4)-GlcNS6S-<br>IdoA2S(1C4)-GlcNS6S-<br>IdoA2S(1C4)-GlcNS6S | IdoA-GlcN    | 1                | -75.6  | -124   | Xray     |
| 4PXQ | 6      | $\Delta$ UA2S-GlcNS6S-IdoA2S(1C4)-<br>GlcNS6S-IdoA2S(2SO)-GlcNS6S   | IdoA-GlcN    | 1                | -78.3  | -113.2 | Xray     |
| 1XMN | 6      | GlcNS6S-IdoA2S(1C4)-<br>GlcNS6S-IdoA2S(1C4)-<br>GlcNS6S-IdoA2S(2SO) | IdoA-GlcN    | 2                | -100.8 | -122.8 | Xray     |
| 4C4N | 6      | GlcNS6S-IdoA2S(2SO)-<br>GlcNS6S-IdoA2S(1C4)-<br>GlcNS6S-IdoA2S(1C4) | IdoA-GlcN    | 2                | -68.5  | -107.1 | Xray     |
| 3UAN | 6      | GlcNAc6S-GlcA-GlcNS6S-<br>IdoA2S(1C4)-GlcNS6S-GlcA                  | IdoA-GlcN    | 2                | -75.2  | -106.8 | Xray     |
| 4RDA | 6      | GlcNS6S-IdoA2S(1C4)-<br>GlcNS6S-IdoA2S(1C4)-<br>GlcNS6S-IdoA2S(1C4) | IdoA-GlcN    | 2                | -65.2  | -87.2  | Xray     |
| 5T05 | 6      | GlcNS-GlcA-GlcNS-<br>IdoA2S(1C4)-GlcNS-GlcA                         | IdoA-GlcN    | 2                | -77.5  | -112.6 | Xray     |
| 5T0A | 6      | GlcNS-GlcA-GlcNS-<br>IdoA2S(1C4)-GlcNS-GlcA                         | IdoA-GlcN    | 2                | -78.1  | -108.2 | Xray     |
| 5T03 | 6      | GlcNS-GlcA-GlcNS-<br>IdoA2S(1C4)-GlcNS-GlcA                         | IdoA-GlcN    | 2                | -75.7  | -116.4 | Xray     |
| 1BFC | 6      | $\Delta$ UA2S-GlcNS6S-IdoA2S(1C4)-<br>GlcNS6S-IdoA2S(2SO)-GlcNS6S   | IdoA-GlcN    | 3                | -63.4  | -99.4  | Xray     |
| 1XT3 | 6      | $\Delta$ UA2S-GlcNS6S-IdoA2S(1C4)-<br>GlcNS6S-IdoA2S(2SO)-GlcNS6S   | IdoA-GlcN    | 3                | -61.4  | -130.3 | Xray     |
| 3MKP | 6      | IdoA2S(2SO)-GlcNS6S-<br>IdoA2S(1C4)-GlcNS6S-<br>IdoA2S(1C4)-GlcNS6S | IdoA-GlcN    | 3                | -74.1  | -98.7  | Xray     |
| 3OJV | 6      | $\Delta$ UA2S-GlcNS6S-IdoA2S(1C4)-<br>GlcNS6S-IdoA2S(1C4)-GlcNS6S   | IdoA-GlcN    | 3                | -63    | -88    | Xray     |
| 4AK2 | 6      | IdoA2S(1C4)-GlcNS6S-<br>IdoA2S(1C4)-GlcNS6S-<br>IdoA2S(1C4)-GlcNS6S | IdoA-GlcN    | 3                | -78.9  | -115.2 | Xray     |
| 4PXQ | 6      | $\Delta$ UA2S-GlcNS6S-IdoA2S(1C4)-<br>GlcNS6S-IdoA2S(2SO)-GlcNS6S   | IdoA-GlcN    | 3                | -76.1  | -121.9 | Xray     |
| 3UAN | 6      | GlcNAc6S-GlcA-GlcNS6S-<br>IdoA2S(1C4)-GlcNS6S-GlcA                  | GlcA-GlcN    | 4                | -84.5  | -103.3 | Xray     |

| PDB  | Length | Sequence                                                                        | Linkage Type     | Linkage Position | $\Phi$ | $\Psi$ | Xray/NMR |
|------|--------|---------------------------------------------------------------------------------|------------------|------------------|--------|--------|----------|
| 5T05 | 6      | GlcNS-GlcA-GlcNS-IdoA2S(1C4)-GlcNS-GlcA                                         | GlcA-GlcN        | 4                | -81.8  | -100.5 | Xray     |
| 5T0A | 6      | GlcNS-GlcA-GlcNS-IdoA2S(1C4)-GlcNS-GlcA                                         | GlcA-GlcN        | 4                | -77.6  | -101.5 | Xray     |
| 5T03 | 6      | GlcNS-GlcA-GlcNS-IdoA2S(1C4)-GlcNS-GlcA                                         | GlcA-GlcN        | 4                | -82.3  | -100.6 | Xray     |
| 1XMN | 6      | GlcNS6S-IdoA2S(1C4)-GlcNS6S-IdoA2S(1C4)-GlcNS6S-IdoA2S(2SO)                     | IdoA-GlcN        | 4                | -79.2  | -91.4  | Xray     |
| 4C4N | 6      | GlcNS6S-IdoA2S(2SO)-GlcNS6S-IdoA2S(1C4)-GlcNS6S-IdoA2S(1C4)                     | IdoA-GlcN        | 4                | -70    | -99.5  | Xray     |
| 4RDA | 6      | GlcNS6S-IdoA2S(1C4)-GlcNS6S-IdoA2S(1C4)-GlcNS6S-IdoA2S(1C4)                     | IdoA-GlcN        | 4                | -71.7  | -113.6 | Xray     |
| 3MKP | 6      | IdoA2S(2SO)-GlcNS6S-IdoA2S(1C4)-GlcNS6S-IdoA2S(1C4)-GlcNS6S                     | IdoA-GlcN        | 5                | -73.9  | -102.4 | Xray     |
| 4AK2 | 6      | IdoA2S(1C4)-GlcNS6S-IdoA2S(1C4)-GlcNS6S-IdoA2S(1C4)-GlcNS6S                     | IdoA-GlcN        | 5                | -73.4  | -118.4 | Xray     |
| 1BFC | 6      | $\Delta$ UA2S-GlcNS6S-IdoA2S(1C4)-GlcNS6S-IdoA2S(2SO)-GlcNS6S                   | $\Delta$ UA-GlcN | 5                | -66.6  | -115.7 | Xray     |
| 1XT3 | 6      | $\Delta$ UA2S-GlcNS6S-IdoA2S(1C4)-GlcNS6S-IdoA2S(2SO)-GlcNS6S                   | $\Delta$ UA-GlcN | 5                | -65.6  | -129.8 | Xray     |
| 3OJV | 6      | $\Delta$ UA2S-GlcNS6S-IdoA2S(1C4)-GlcNS6S-IdoA2S(1C4)-GlcNS6S                   | $\Delta$ UA-GlcN | 5                | 99.9   | 68.7   | Xray     |
| 4PXQ | 6      | $\Delta$ UA2S-GlcNS6S-IdoA2S(1C4)-GlcNS6S-IdoA2S(2SO)-GlcNS6S                   | $\Delta$ UA-GlcN | 5                | -62.3  | -105.4 | Xray     |
| 5UE2 | 8      | IdoA2S(1C4)-GlcNS6S-IdoA2S(1C4)-GlcNS6S-IdoA2S(1C4)-GlcNS6S-IdoA2S(1C4)-GlcNS6S | IdoA-GlcN        | 1                | -91.6  | -161.3 | NMR      |
| 5UE5 | 8      | IdoA2S(1C4)-GlcNS6S-IdoA2S(1C4)-GlcNS6S-IdoA2S(1C4)-GlcNS6S-IdoA2S(1C4)-GlcNS6S | IdoA-GlcN        | 1                | -158.8 | -158.1 | NMR      |
|      |        |                                                                                 |                  |                  |        |        |          |

| PDB  | Length | Sequence                                                                                      | Linkage Type | Linkage Position | $\Phi$  | $\Psi$  | Xray/NMR |
|------|--------|-----------------------------------------------------------------------------------------------|--------------|------------------|---------|---------|----------|
| 7B8I | 8      | GlcNS6S-IdoA2S(1C4)-<br>GlcNS6S-IdoA2S(1C4)-<br>GlcNS6S-IdoA2S(1C4)-<br>GlcNS6S-IdoA2S(1C4)   | IdoA-GlcN    | 2                | -110.2  | -103.7  | Xray     |
| 3INA | 8      | GlcNS6S-IdoA2S(2SO)-<br>GlcNS3S6S-IdoA2S(1C4)-<br>GlcNS6S-IdoA2S(1C4)-<br>GlcNS6S-IdoA2S(1C4) | IdoA-GlcN    | 2                | -48     | -98.8   | Xray     |
| 5UE2 | 8      | IdoA2S(1C4)-GlcNS6S-<br>IdoA2S(1C4)-GlcNS6S-<br>IdoA2S(1C4)-GlcNS6S-<br>IdoA2S(1C4)-GlcNS6S   | IdoA-GlcN    | 3                | -64     | -94.8   | NMR      |
| 5UE5 | 8      | IdoA2S(1C4)-GlcNS6S-<br>IdoA2S(1C4)-GlcNS6S-<br>IdoA2S(1C4)-GlcNS6S-<br>IdoA2S(1C4)-GlcNS6S   | IdoA-GlcN    | 3                | -88.3   | -168.1  | NMR      |
| 7B8I | 8      | GlcNS6S-IdoA2S(1C4)-<br>GlcNS6S-IdoA2S(1C4)-<br>GlcNS6S-IdoA2S(1C4)-<br>GlcNS6S-IdoA2S(1C4)   | IdoA-GlcN    | 4                | -93.7   | -117    | Xray     |
| 3INA | 8      | GlcNS6S-IdoA2S(2SO)-<br>GlcNS3S6S-IdoA2S(1C4)-<br>GlcNS6S-IdoA2S(1C4)-<br>GlcNS6S-IdoA2S(1C4) | IdoA-GlcN    | 4                | -133.17 | 63.53   | Xray     |
| 5UE2 | 8      | IdoA2S(1C4)-GlcNS6S-<br>IdoA2S(1C4)-GlcNS6S-<br>IdoA2S(1C4)-GlcNS6S-<br>IdoA2S(1C4)-GlcNS6S   | IdoA-GlcN    | 5                | -80.2   | -158.9  | NMR      |
| 5UE5 | 8      | IdoA2S(1C4)-GlcNS6S-<br>IdoA2S(1C4)-GlcNS6S-<br>IdoA2S(1C4)-GlcNS6S-<br>IdoA2S(1C4)-GlcNS6S   | IdoA-GlcN    | 5                | -126    | -142.7  | NMR      |
| 7B8I | 8      | GlcNS6S-IdoA2S(1C4)-<br>GlcNS6S-IdoA2S(1C4)-<br>GlcNS6S-IdoA2S(1C4)-<br>GlcNS6S-IdoA2S(1C4)   | IdoA-GlcN    | 6                | -112.5  | 80.4    | Xray     |
| 3INA | 8      | GlcNS6S-IdoA2S(2SO)-<br>GlcNS3S6S-IdoA2S(1C4)-<br>GlcNS6S-IdoA2S(1C4)-<br>GlcNS6S-IdoA2S(1C4) | IdoA-GlcN    | 6                | -64.04  | -100.97 | Xray     |

| PDB  | Length | Sequence                                                                                                            | Linkage Type | Linkage Position | $\Phi$ | $\Psi$ | Xray/NMR |
|------|--------|---------------------------------------------------------------------------------------------------------------------|--------------|------------------|--------|--------|----------|
| 5UE2 | 8      | IdoA2S(1C4)-GlcNS6S-<br>IdoA2S(1C4)-GlcNS6S-<br>IdoA2S(1C4)-GlcNS6S-<br>IdoA2S(1C4)-GlcNS6S                         | IdoA-GlcN    | 7                | -70.3  | -150.1 | NMR      |
| 5UE5 | 8      | IdoA2S(1C4)-GlcNS6S-<br>IdoA2S(1C4)-GlcNS6S-<br>IdoA2S(1C4)-GlcNS6S-<br>IdoA2S(1C4)-GlcNS6S                         | IdoA-GlcN    | 7                | -83.5  | -159.6 | NMR      |
| 1GMO | 9      | GlcNS6S-IdoA2S(2SO)-<br>GlcNS6S-IdoA2S(1C4)-<br>GlcNS6S-IdoA2S(1C4)-<br>GlcNS6S-IdoA2S(2SO)-GlcNS6S                 | IdoA-GlcN    | 1                | -87.5  | -113.3 | Xray     |
| 1GMO | 9      | GlcNS6S-IdoA2S(2SO)-<br>GlcNS6S-IdoA2S(1C4)-<br>GlcNS6S-IdoA2S(1C4)-<br>GlcNS6S-IdoA2S(2SO)-GlcNS6S                 | IdoA-GlcN    | 3                | -101.3 | -124.5 | Xray     |
| 1GMO | 9      | GlcNS6S-IdoA2S(2SO)-<br>GlcNS6S-IdoA2S(1C4)-<br>GlcNS6S-IdoA2S(1C4)-<br>GlcNS6S-IdoA2S(2SO)-GlcNS6S                 | IdoA-GlcN    | 5                | -75    | -102.7 | Xray     |
| 1GMO | 9      | GlcNS6S-IdoA2S(2SO)-<br>GlcNS6S-IdoA2S(1C4)-<br>GlcNS6S-IdoA2S(1C4)-<br>GlcNS6S-IdoA2S(2SO)-GlcNS6S                 | IdoA-GlcN    | 7                | -93.6  | -82.6  | Xray     |
| 1E0O | 10     | IdoA2S(2SO)-GlcNS6S-<br>IdoA2S(2SO)-GlcNS6S-<br>IdoA2S(2SO)-GlcNS6S-<br>IdoA2S(2SO)-GlcNS6S-<br>IdoA2S(1C4)-GlcNS6S | IdoA-GlcN    | 1                | -79.6  | -107.6 | Xray     |
| 1E0O | 10     | IdoA2S(2SO)-GlcNS6S-<br>IdoA2S(2SO)-GlcNS6S-<br>IdoA2S(2SO)-GlcNS6S-<br>IdoA2S(2SO)-GlcNS6S-<br>IdoA2S(1C4)-GlcNS6S | IdoA-GlcN    | 3                | -62.1  | -164.8 | Xray     |
| 1E0O | 10     | IdoA2S(2SO)-GlcNS6S-<br>IdoA2S(2SO)-GlcNS6S-<br>IdoA2S(2SO)-GlcNS6S-<br>IdoA2S(2SO)-GlcNS6S-<br>IdoA2S(1C4)-GlcNS6S | IdoA-GlcN    | 5                | -76.4  | -103.2 | Xray     |

| PDB  | Length | Sequence                                                                                                            | Linkage Type | Linkage Position | $\Phi$ | $\Psi$ | Xray/NMR |
|------|--------|---------------------------------------------------------------------------------------------------------------------|--------------|------------------|--------|--------|----------|
| 1E0O | 10     | IdoA2S(2SO)-GlcNS6S-<br>IdoA2S(2SO)-GlcNS6S-<br>IdoA2S(2SO)-GlcNS6S-<br>IdoA2S(2SO)-GlcNS6S-<br>IdoA2S(1C4)-GlcNS6S | IdoA-GlcN    | 7                | -64.8  | -116.5 | Xray     |
| 1E0O | 10     | IdoA2S(2SO)-GlcNS6S-<br>IdoA2S(2SO)-GlcNS6S-<br>IdoA2S(2SO)-GlcNS6S-<br>IdoA2S(2SO)-GlcNS6S-<br>IdoA2S(1C4)-GlcNS6S | IdoA-GlcN    | 9                | -106.1 | -131   | Xray     |
| 1HPN | 12     | IdoA(2SO)-GlcNS6S(6x)                                                                                               | IdoA-GlcN    | 1                | -55.3  | -107.5 | NMR      |
| 1HPN | 12     | IdoA(2SO)-GlcNS6S(6x)                                                                                               | IdoA-GlcN    | 3                | -55.4  | -107.5 | NMR      |
| 1HPN | 12     | IdoA(2SO)-GlcNS6S(6x)                                                                                               | IdoA-GlcN    | 5                | -55.4  | -107.6 | NMR      |
| 1HPN | 12     | IdoA(2SO)-GlcNS6S(6x)                                                                                               | IdoA-GlcN    | 7                | -55.3  | -107.5 | NMR      |
| 1HPN | 12     | IdoA(2SO)-GlcNS6S(6x)                                                                                               | IdoA-GlcN    | 9                | -55.3  | -107.5 | NMR      |
| 1HPN | 12     | IdoA(2SO)-GlcNS6S(6x)                                                                                               | IdoA-GlcN    | 11               | -55.2  | -107.7 | NMR      |

**Table S3.** Phi and psi corresponding to different glycosidic linkages of Hp/HS complexes with diverse proteins obtained from the protein data bank (PDB). Shown below are  $\Phi$  and  $\Psi$  values for amine – acid linkages (GlcN→UA).

| PDB  | Length | Sequence                                       | Linkage Type | Linkage Position | $\Phi$ | $\Psi$ | Xray/NMR |
|------|--------|------------------------------------------------|--------------|------------------|--------|--------|----------|
| 3E7J | 4      | $\Delta$ UA-GlcNAc-GlcA-GlcNAc                 | GlcN-GlcA    | 2                | 84.9   | -145.6 | Xray     |
| 2GD4 | 5      | GlcNS6S-GlcA-GlcNS3S6S-IdoA2S(2SO)-GlcNS6S     | GlcN-GlcA    | 4                | 101.5  | -158   | Xray     |
| 4X7R | 5      | GlcNS6S-GlcA-GlcNS3S6S-IdoA2S(2SO)-GlcNS6S     | GlcN-GlcA    | 4                | 96.5   | -128.2 | Xray     |
| 4R9W | 5      | GlcNS6S-GlcA-GlcNS3S6S-IdoA2S(2SO)-GlcNS6S     | GlcN-GlcA    | 4                | 69.5   | -155.4 | Xray     |
| 3EVJ | 5      | GlcNS6S-GlcA-GlcNS3S6S-IdoA2S(2SO)-GlcNS6S     | GlcN-GlcA    | 4                | 100.5  | -167.2 | Xray     |
| 3UAN | 6      | GlcNAc6S-GlcA-GlcNS6S-IdoA2S(1C4)-GlcNS6S-GlcA | GlcN-GlcA    | 1                | 72.7   | -144   | Xray     |
| 3UAN | 6      | GlcNAc6S-GlcA-GlcNS6S-IdoA2S(1C4)-GlcNS6S-GlcA | GlcN-GlcA    | 5                | 90.3   | -156.1 | Xray     |
| 5T05 | 6      | GlcNS-GlcA-GlcNS-IdoA2S(1C4)-GlcNS-GlcA        | GlcN-GlcA    | 1                | 111.6  | -110.9 | Xray     |
| 5T05 | 6      | GlcNS-GlcA-GlcNS-IdoA2S(1C4)-GlcNS-GlcA        | GlcN-GlcA    | 5                | 82.6   | -146.9 | Xray     |
| 5T0A | 6      | GlcNS-GlcA-GlcNS-IdoA2S(1C4)-GlcNS-GlcA        | GlcN-GlcA    | 1                | 108.7  | -106.2 | Xray     |
| 5T0A | 6      | GlcNS-GlcA-GlcNS-IdoA2S(1C4)-GlcNS-GlcA        | GlcN-GlcA    | 5                | 81.8   | -145.9 | Xray     |
| 5T03 | 6      | GlcNS-GlcA-GlcNS-IdoA2S(1C4)-GlcNS-GlcA        | GlcN-GlcA    | 1                | 102.5  | -100.7 | Xray     |
| 5T03 | 6      | GlcNS-GlcA-GlcNS-IdoA2S(1C4)-GlcNS-GlcA        | GlcN-GlcA    | 5                | 79.5   | -145.9 | Xray     |
| 5DNF | 3      | GlcNS6S-IdoA2S(1C4)-GlcNS6S                    | GlcN-IdoA    | 2                | 84.7   | -128   | Xray     |
| 1BFB | 4      | $\Delta$ UA2S-GlcNS6S-IdoA2S(1C4)-GlcNS6S      | GlcN-IdoA    | 2                | 94.5   | -129.8 | Xray     |
| 2HYU | 4      | $\Delta$ UA2S-GlcNS6S-IdoA2S(1C4)-GlcNS6S      | GlcN-IdoA    | 2                | 80.9   | -141.5 | Xray     |
| 2VRA | 4      | IdoA2S(2SO)-GlcNS6S-IdoA2S(1C4)-GlcNS6S        | GlcN-IdoA    | 2                | 89.8   | -97.4  | Xray     |
| 3QMK | 4      | IdoA2S(1C4)-GlcNS6S-IdoA2S(1C4)-GlcNS6S        | GlcN-IdoA    | 2                | 81.1   | -145.5 | Xray     |
| 5E9C | 4      | $\Delta$ UA2S-GlcNS6S-IdoA-GlcNS6S             | GlcN-IdoA    | 2                | 50     | -134.8 | Xray     |



| PDB  | Length | Sequence                                                      | Linkage Type | Linkage Position | $\Phi$ | $\Psi$ | Xray/NMR |
|------|--------|---------------------------------------------------------------|--------------|------------------|--------|--------|----------|
| 1T8U | 4      | $\Delta$ UA2S-GlcNS6S-IdoA2S(2SO)-GlcNS6S                     | GlcN-IdoA    | 2                | 55.3   | -176.1 | Xray     |
| 1GMN | 5      | IdoA2S(2SO)-GlcNS6S-IdoA2S(1C4)-GlcNS6S-IdoA2S(2SO)           | GlcN-IdoA    | 1                | 78.4   | -61.3  | Xray     |
| 1GMN | 5      | IdoA2S(2SO)-GlcNS6S-IdoA2S(1C4)-GlcNS6S-IdoA2S(2SO)           | GlcN-IdoA    | 3                | 82.6   | -132.2 | Xray     |
| 2HYV | 5      | $\Delta$ UA2S-GlcNS6S-IdoA2S(1C4)-GlcNS6S-IdoA2S(1C4)         | GlcN-IdoA    | 1                | 74.1   | -141.2 | Xray     |
| 2HYV | 5      | $\Delta$ UA2S-GlcNS6S-IdoA2S(1C4)-GlcNS6S-IdoA2S(1C4)         | GlcN-IdoA    | 3                | 81.5   | -142.3 | Xray     |
| 3DY0 | 5      | IdoA(2SO)-GlcNS6S-IdoA2S(1C4)-GlcNS6S-IdoA(1C4)               | GlcN-IdoA    | 1                | 77.4   | -166   | Xray     |
| 3DY0 | 5      | IdoA(2SO)-GlcNS6S-IdoA2S(1C4)-GlcNS6S-IdoA(1C4)               | GlcN-IdoA    | 3                | 75.4   | -134.4 | Xray     |
| 7B8H | 5      | IdoA2S(1C4)-GlcNS6S-IdoA2S(1C4)-GlcNS6S-IdoA2S(1C4)           | GlcN-IdoA    | 1                | 90     | -126.4 | Xray     |
| 7B8H | 5      | IdoA2S(1C4)-GlcNS6S-IdoA2S(1C4)-GlcNS6S-IdoA2S(1C4)           | GlcN-IdoA    | 3                | 101.2  | -121.6 | Xray     |
| 2GD4 | 5      | GlcNS6S-GlcA-GlcNS3S6S-IdoA2S(2SO)-GlcNS6S                    | GlcN-IdoA    | 2                | 62.5   | -156.2 | Xray     |
| 4X7R | 5      | GlcNS6S-GlcA-GlcNS3S6S-IdoA2S(2SO)-GlcNS6S                    | GlcN-IdoA    | 2                | 73.2   | -151.9 | Xray     |
| 4R9W | 5      | GlcNS6S-GlcA-GlcNS3S6S-IdoA2S(2SO)-GlcNS6S                    | GlcN-IdoA    | 2                | 71     | -132   | Xray     |
| 3EVJ | 5      | GlcNS6S-GlcA-GlcNS3S6S-IdoA2S(2SO)-GlcNS6S                    | GlcN-IdoA    | 2                | 58.7   | -160.9 | Xray     |
| 1BFC | 6      | $\Delta$ UA2S-GlcNS6S-IdoA2S(1C4)-GlcNS6S-IdoA2S(2SO)-GlcNS6S | GlcN-IdoA    | 2                | 83.1   | -158.2 | Xray     |
| 1BFC | 6      | $\Delta$ UA2S-GlcNS6S-IdoA2S(1C4)-GlcNS6S-IdoA2S(2SO)-GlcNS6S | GlcN-IdoA    | 4                | 93.7   | -125.6 | Xray     |
| 1XMN | 6      | GlcNS6S-IdoA2S(1C4)-GlcNS6S-IdoA2S(1C4)-GlcNS6S-IdoA2S(2SO)   | GlcN-IdoA    | 1                | 147.5  | -104.2 | Xray     |
| 1XMN | 6      | GlcNS6S-IdoA2S(1C4)-GlcNS6S-IdoA2S(1C4)-GlcNS6S-IdoA2S(2SO)   | GlcN-IdoA    | 3                | 68.6   | -145.7 | Xray     |

| PDB  | Length | Sequence                                                            | Linkage Type | Linkage Position | $\Phi$ | $\Psi$ | Xray/NMR |
|------|--------|---------------------------------------------------------------------|--------------|------------------|--------|--------|----------|
| 1XMN | 6      | GlcNS6S-IdoA2S(1C4)-<br>GlcNS6S-IdoA2S(1C4)-<br>GlcNS6S-IdoA2S(2SO) | GlcN-IdoA    | 5                | 58.7   | -159.5 | Xray     |
| 1XT3 | 6      | $\Delta$ UA2S-GlcNS6S-IdoA2S(1C4)-<br>GlcNS6S-IdoA2S(2SO)-GlcNS6S   | GlcN-IdoA    | 2                | 130.5  | -122.4 | Xray     |
| 1XT3 | 6      | $\Delta$ UA2S-GlcNS6S-IdoA2S(1C4)-<br>GlcNS6S-IdoA2S(2SO)-GlcNS6S   | GlcN-IdoA    | 4                | 115.3  | -155.2 | Xray     |
| 3MKP | 6      | IdoA2S(2SO)-GlcNS6S-<br>IdoA2S(1C4)-GlcNS6S-<br>IdoA2S(1C4)-GlcNS6S | GlcN-IdoA    | 2                | 85.8   | -137.2 | Xray     |
| 3MKP | 6      | IdoA2S(2SO)-GlcNS6S-<br>IdoA2S(1C4)-GlcNS6S-<br>IdoA2S(1C4)-GlcNS6S | GlcN-IdoA    | 4                | 100.8  | -132.3 | Xray     |
| 3OJV | 6      | $\Delta$ UA2S-GlcNS6S-IdoA2S(1C4)-<br>GlcNS6S-IdoA2S(1C4)-GlcNS6S   | GlcN-IdoA    | 2                | 89.9   | -158.5 | Xray     |
| 3OJV | 6      | $\Delta$ UA2S-GlcNS6S-IdoA2S(1C4)-<br>GlcNS6S-IdoA2S(1C4)-GlcNS6S   | GlcN-IdoA    | 4                | 77     | -144.6 | Xray     |
| 4AK2 | 6      | IdoA2S(1C4)-GlcNS6S-<br>IdoA2S(1C4)-GlcNS6S-<br>IdoA2S(1C4)-GlcNS6S | GlcN-IdoA    | 2                | 83.2   | -143.5 | Xray     |
| 4AK2 | 6      | IdoA2S(1C4)-GlcNS6S-<br>IdoA2S(1C4)-GlcNS6S-<br>IdoA2S(1C4)-GlcNS6S | GlcN-IdoA    | 4                | 95.2   | -102.2 | Xray     |
| 4C4N | 6      | GlcNS6S-IdoA2S(2SO)-<br>GlcNS6S-IdoA2S(1C4)-<br>GlcNS6S-IdoA2S(1C4) | GlcN-IdoA    | 1                | 68.8   | -149.9 | Xray     |
| 4C4N | 6      | GlcNS6S-IdoA2S(2SO)-<br>GlcNS6S-IdoA2S(1C4)-<br>GlcNS6S-IdoA2S(1C4) | GlcN-IdoA    | 3                | 86.4   | -149.4 | Xray     |
| 4C4N | 6      | GlcNS6S-IdoA2S(2SO)-<br>GlcNS6S-IdoA2S(1C4)-<br>GlcNS6S-IdoA2S(1C4) | GlcN-IdoA    | 5                | 128.5  | -112.1 | Xray     |
| 4PXQ | 6      | $\Delta$ UA2S-GlcNS6S-IdoA2S(1C4)-<br>GlcNS6S-IdoA2S(2SO)-GlcNS6S   | GlcN-IdoA    | 2                | 42.9   | -155.3 | Xray     |
| 4PXQ | 6      | $\Delta$ UA2S-GlcNS6S-IdoA2S(1C4)-<br>GlcNS6S-IdoA2S(2SO)-GlcNS6S   | GlcN-IdoA    | 4                | 68.2   | -145.4 | Xray     |
| 3UAN | 6      | GlcNAc6S-GlcA-GlcNS6S-<br>IdoA2S(1C4)-GlcNS6S-GlcA                  | GlcN-IdoA    | 3                | 60.8   | -153.8 | Xray     |

| PDB  | Length | Sequence                                                                                    | Linkage Type | Linkage Position | $\Phi$ | $\Psi$ | Xray/NMR |
|------|--------|---------------------------------------------------------------------------------------------|--------------|------------------|--------|--------|----------|
| 4RDA | 6      | GlcNS6S-IdoA2S(1C4)-<br>GlcNS6S-IdoA2S(1C4)-<br>GlcNS6S-IdoA2S(1C4)                         | GlcN-IdoA    | 1                | 41.8   | -166.3 | Xray     |
| 4RDA | 6      | GlcNS6S-IdoA2S(1C4)-<br>GlcNS6S-IdoA2S(1C4)-<br>GlcNS6S-IdoA2S(1C4)                         | GlcN-IdoA    | 3                | 27.1   | -167.2 | Xray     |
| 4RDA | 6      | GlcNS6S-IdoA2S(1C4)-<br>GlcNS6S-IdoA2S(1C4)-<br>GlcNS6S-IdoA2S(1C4)                         | GlcN-IdoA    | 5                | 74.2   | -147   | Xray     |
| 5T05 | 6      | GlcNS-GlcA-GlcNS-<br>IdoA2S(1C4)-GlcNS-GlcA                                                 | GlcN-IdoA    | 3                | 80.2   | -142.7 | Xray     |
| 5T0A | 6      | GlcNS-GlcA-GlcNS-<br>IdoA2S(1C4)-GlcNS-GlcA                                                 | GlcN-IdoA    | 3                | 79.2   | -143.1 | Xray     |
| 5T03 | 6      | GlcNS-GlcA-GlcNS-<br>IdoA2S(1C4)-GlcNS-GlcA                                                 | GlcN-IdoA    | 3                | 70.5   | -139   | Xray     |
| 5UE2 | 8      | IdoA2S(1C4)-GlcNS6S-<br>IdoA2S(1C4)-GlcNS6S-<br>IdoA2S(1C4)-GlcNS6S-<br>IdoA2S(1C4)-GlcNS6S | GlcN-IdoA    | 2                | 85.2   | -149.5 | NMR      |
| 5UE2 | 8      | IdoA2S(1C4)-GlcNS6S-<br>IdoA2S(1C4)-GlcNS6S-<br>IdoA2S(1C4)-GlcNS6S-<br>IdoA2S(1C4)-GlcNS6S | GlcN-IdoA    | 4                | 89.2   | -153.2 | NMR      |
| 5UE2 | 8      | IdoA2S(1C4)-GlcNS6S-<br>IdoA2S(1C4)-GlcNS6S-<br>IdoA2S(1C4)-GlcNS6S-<br>IdoA2S(1C4)-GlcNS6S | GlcN-IdoA    | 6                | 80.3   | -147.8 | NMR      |
| 5UE5 | 8      | IdoA2S(1C4)-GlcNS6S-<br>IdoA2S(1C4)-GlcNS6S-<br>IdoA2S(1C4)-GlcNS6S-<br>IdoA2S(1C4)-GlcNS6S | GlcN-IdoA    | 2                | 123.1  | -115.6 | NMR      |
| 5UE5 | 8      | IdoA2S(1C4)-GlcNS6S-<br>IdoA2S(1C4)-GlcNS6S-<br>IdoA2S(1C4)-GlcNS6S-<br>IdoA2S(1C4)-GlcNS6S | GlcN-IdoA    | 4                | 79.1   | -146.8 | NMR      |
| 5UE5 | 8      | IdoA2S(1C4)-GlcNS6S-<br>IdoA2S(1C4)-GlcNS6S-<br>IdoA2S(1C4)-GlcNS6S-<br>IdoA2S(1C4)-GlcNS6S | GlcN-IdoA    | 6                | 97     | -149.6 | NMR      |

| PDB  | Length | Sequence                                                                                            | Linkage Type | Linkage Position | $\Phi$ | $\Psi$  | Xray/NMR |
|------|--------|-----------------------------------------------------------------------------------------------------|--------------|------------------|--------|---------|----------|
| 7B8I | 8      | GlcNS6S-IdoA2S(1C4)-<br>GlcNS6S-IdoA2S(1C4)-<br>GlcNS6S-IdoA2S(1C4)-<br>GlcNS6S-IdoA2S(1C4)         | GlcN-IdoA    | 1                | 50.1   | -170.4  | Xray     |
| 7B8I | 8      | GlcNS6S-IdoA2S(1C4)-<br>GlcNS6S-IdoA2S(1C4)-<br>GlcNS6S-IdoA2S(1C4)-<br>GlcNS6S-IdoA2S(1C4)         | GlcN-IdoA    | 3                | 72.4   | -152.2  | Xray     |
| 7B8I | 8      | GlcNS6S-IdoA2S(1C4)-<br>GlcNS6S-IdoA2S(1C4)-<br>GlcNS6S-IdoA2S(1C4)-<br>GlcNS6S-IdoA2S(1C4)         | GlcN-IdoA    | 5                | 113.6  | -142.1  | Xray     |
| 7B8I | 8      | GlcNS6S-IdoA2S(1C4)-<br>GlcNS6S-IdoA2S(1C4)-<br>GlcNS6S-IdoA2S(1C4)-<br>GlcNS6S-IdoA2S(1C4)         | GlcN-IdoA    | 7                | -52.4  | -144.8  | Xray     |
| 3INA | 8      | GlcNS6S-IdoA2S(2SO)-<br>GlcNS3S6S-IdoA2S(1C4)-<br>GlcNS6S-IdoA2S(1C4)-<br>GlcNS6S-IdoA2S(1C4)       | GlcN-IdoA    | 1                | 82.84  | -149.76 | Xray     |
| 3INA | 8      | GlcNS6S-IdoA2S(2SO)-<br>GlcNS3S6S-IdoA2S(1C4)-<br>GlcNS6S-IdoA2S(1C4)-<br>GlcNS6S-IdoA2S(1C4)       | GlcN-IdoA    | 3                | 76.91  | -145.91 | Xray     |
| 3INA | 8      | GlcNS6S-IdoA2S(2SO)-<br>GlcNS3S6S-IdoA2S(1C4)-<br>GlcNS6S-IdoA2S(1C4)-<br>GlcNS6S-IdoA2S(1C4)       | GlcN-IdoA    | 5                | 91.1   | -151.28 | Xray     |
| 3INA | 8      | GlcNS6S-IdoA2S(2SO)-<br>GlcNS3S6S-IdoA2S(1C4)-<br>GlcNS6S-IdoA2S(1C4)-<br>GlcNS6S-IdoA2S(1C4)       | GlcN-IdoA    | 7                | 98.72  | -134.84 | Xray     |
| 1GMO | 9      | GlcNS6S-IdoA2S(2SO)-<br>GlcNS6S-IdoA2S(1C4)-<br>GlcNS6S-IdoA2S(1C4)-<br>GlcNS6S-IdoA2S(2SO)-GlcNS6S | GlcN-IdoA    | 2                | 54     | -142.5  | Xray     |
| 1GMO | 9      | GlcNS6S-IdoA2S(2SO)-<br>GlcNS6S-IdoA2S(1C4)-<br>GlcNS6S-IdoA2S(1C4)-<br>GlcNS6S-IdoA2S(2SO)-GlcNS6S | GlcN-IdoA    | 4                | 91.7   | -144.3  | Xray     |

| PDB  | Length | Sequence                                                                                                            | Linkage Type | Linkage Position | $\Phi$ | $\Psi$ | Xray/NMR |
|------|--------|---------------------------------------------------------------------------------------------------------------------|--------------|------------------|--------|--------|----------|
| 1GMO | 9      | GlcNS6S-IdoA2S(2SO)-<br>GlcNS6S-IdoA2S(1C4)-<br>GlcNS6S-IdoA2S(1C4)-<br>GlcNS6S-IdoA2S(2SO)-GlcNS6S                 | GlcN-IdoA    | 6                | 79.5   | -129.4 | Xray     |
| 1GMO | 9      | GlcNS6S-IdoA2S(2SO)-<br>GlcNS6S-IdoA2S(1C4)-<br>GlcNS6S-IdoA2S(1C4)-<br>GlcNS6S-IdoA2S(2SO)-GlcNS6S                 | GlcN-IdoA    | 8                | 76     | -140.4 | Xray     |
| 1E0O | 10     | IdoA2S(2SO)-GlcNS6S-<br>IdoA2S(2SO)-GlcNS6S-<br>IdoA2S(2SO)-GlcNS6S-<br>IdoA2S(2SO)-GlcNS6S-<br>IdoA2S(1C4)-GlcNS6S | GlcN-IdoA    | 2                | 78.6   | -140.4 | Xray     |
| 1E0O | 10     | IdoA2S(2SO)-GlcNS6S-<br>IdoA2S(2SO)-GlcNS6S-<br>IdoA2S(2SO)-GlcNS6S-<br>IdoA2S(2SO)-GlcNS6S-<br>IdoA2S(1C4)-GlcNS6S | GlcN-IdoA    | 4                | 141.4  | -142.8 | Xray     |
| 1E0O | 10     | IdoA2S(2SO)-GlcNS6S-<br>IdoA2S(2SO)-GlcNS6S-<br>IdoA2S(2SO)-GlcNS6S-<br>IdoA2S(2SO)-GlcNS6S-<br>IdoA2S(1C4)-GlcNS6S | GlcN-IdoA    | 6                | 117.6  | -134.8 | Xray     |
| 1E0O | 10     | IdoA2S(2SO)-GlcNS6S-<br>IdoA2S(2SO)-GlcNS6S-<br>IdoA2S(2SO)-GlcNS6S-<br>IdoA2S(2SO)-GlcNS6S-<br>IdoA2S(1C4)-GlcNS6S | GlcN-IdoA    | 8                | 134.7  | -151.1 | Xray     |
| 1HPN | 12     | IdoA(2SO)-GlcNS6S(6x)                                                                                               | GlcN-IdoA    | 2                | 108.5  | -157.7 | NMR      |
| 1HPN | 12     | IdoA(2SO)-GlcNS6S(6x)                                                                                               | GlcN-IdoA    | 4                | 108.5  | -157.7 | NMR      |
| 1HPN | 12     | IdoA(2SO)-GlcNS6S(6x)                                                                                               | GlcN-IdoA    | 6                | 108.4  | -157.8 | NMR      |
| 1HPN | 12     | IdoA(2SO)-GlcNS6S(6x)                                                                                               | GlcN-IdoA    | 8                | 108.5  | -157.7 | NMR      |
| 1HPN | 12     | IdoA(2SO)-GlcNS6S(6x)                                                                                               | GlcN-IdoA    | 10               | 108.4  | -157.7 | NMR      |

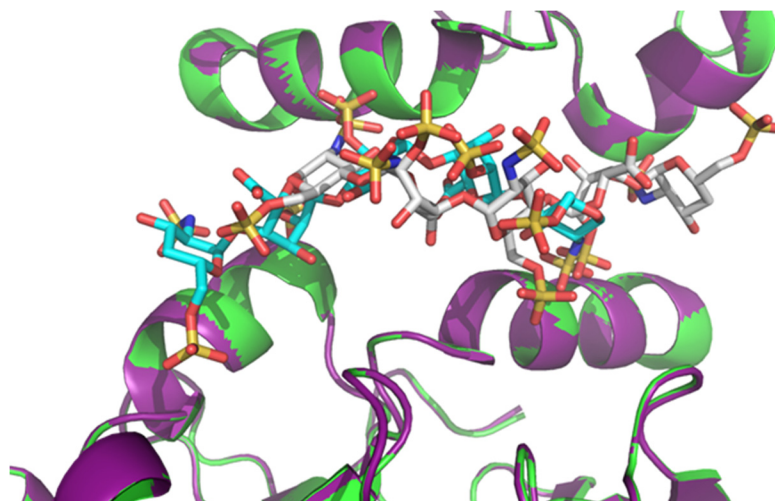

**Figure S3.** Comparative structures of two heparin oligosaccharides bound to thrombin in the 1XMN (thrombin-Hp complex, protein in purple and ligand in cyan) and 1TB6 (AT-Thrombin-HP complex, protein in green and ligand in orange,) crystal structure used in this study. The oligomers, although very similar, bind in different geometries.

**Table S4.** Structures of heparan sulfate oligosaccharides present in co-crystal structures.

| PDB  | Chain Length | Sequence                                                                                                                                                      | Protein(s)                              | Resolution (Å) |
|------|--------------|---------------------------------------------------------------------------------------------------------------------------------------------------------------|-----------------------------------------|----------------|
| 1U4L | 2            | $\Delta$ UA2S-GlcNS6S                                                                                                                                         | RANTES                                  | 2.00           |
| 1U4M | 2            | $\Delta$ UA2S-GlcNS                                                                                                                                           | RANTES                                  | 2.00           |
| 3B9F | 2            | IdoA2S( $^2$ S <sub>O</sub> )-GlcNS                                                                                                                           | Thrombin and PCI                        | 1.60           |
| 5DNF | 3            | GlcNS6S-IdoA2S( $^1$ C <sub>4</sub> )-GlcNS6S                                                                                                                 | RANTES                                  | 2.55           |
| 2HYU | 4            | $\Delta$ UA2S-GlcNS6S-IdoA2S( $^1$ C <sub>4</sub> )-GlcNS6S                                                                                                   | Annexin A2                              | 1.86           |
| 2VRA | 4            | IdoA2S( $^2$ S <sub>O</sub> )-GlcNS6S-IdoA2S( $^1$ C <sub>4</sub> )-GlcNS6S                                                                                   | Robo                                    | 3.20           |
| 6LJL | 4            | $\Delta$ UA2S-GlcNS6S-IdoA2S( $^1$ C <sub>4</sub> )-GlcNS6S                                                                                                   | Hep-Y390A/H555A                         | 1.73           |
| 3EVJ | 5            | GlcNS6S-GlcA-GlcNS3S6S-IdoA2S( $^2$ S <sub>O</sub> )-GlcNS6S                                                                                                  | AT                                      | 3.00           |
| 1TB6 | 5            | GlcNS6S-GlcA-GlcNS3S6S-IdoA2S( $^2$ S <sub>O</sub> )-GlcNS6S                                                                                                  | AT                                      | 2.50           |
| 4R9W | 5            | GlcNS6S-GlcA-GlcNS3S6S-IdoA2S( $^2$ S <sub>O</sub> )-GlcNS6S                                                                                                  | PF4                                     | 2.50           |
| 2HYV | 5            | $\Delta$ UA2S-GlcNS6S-IdoA2S( $^1$ C <sub>4</sub> )-GlcNS6S-IdoA2S( $^1$ C <sub>4</sub> )                                                                     | Annexin 2                               | 1.42           |
| 4AK2 | 6            | IdoA2S( $^1$ C <sub>4</sub> )-GlcNS6S-IdoA2S( $^1$ C <sub>4</sub> )-GlcNS6S-                                                                                  | BT4661                                  | 1.35           |
| 1XMN | 6            | GlcNS6S-IdoA2S( $^1$ C <sub>4</sub> )-GlcNS6S-IdoA2S( $^1$ C <sub>4</sub> )-GlcNS6S-                                                                          | Thrombin                                | 1.85           |
| 3UAN | 6            | GlcNAc6S-GlcA-GlcNS6S-IdoA2S( $^1$ C <sub>4</sub> )-GlcNS6S-GlcA                                                                                              | 3OST1                                   | 1.84           |
| 4C4N | 6            | IdoA2S( $^1$ C <sub>4</sub> )-GlcNS6S-IdoA2S( $^1$ C <sub>4</sub> )-GlcNS6S-                                                                                  | Hedgehog                                | 2.36           |
| 3INA | 8            | GlcNS6S-IdoA2S( $^2$ S <sub>O</sub> )-GlcNS3S6S-IdoA2S( $^1$ C <sub>4</sub> )-<br>GlcNS6S-IdoA2S( $^1$ C <sub>4</sub> )-GlcNS6S-IdoA2S( $^1$ C <sub>4</sub> ) | H151A Heparinase 1                      | 1.90           |
| 7B8I | 8            | GlcNS6S-IdoA2S( $^1$ C <sub>4</sub> )-GlcNS6S-IdoA2S( $^1$ C <sub>4</sub> )-GlcNS6S-<br>IdoA2S( $^1$ C <sub>4</sub> )-GlcNS6S-IdoA2S( $^1$ C <sub>4</sub> )   | Protein kinase CK2<br>catalytic subunit | 2.55           |
| 1E0O | 10           | IdoA2S( $^2$ S <sub>O</sub> )-GlcNS6S-IdoA2S( $^2$ S <sub>O</sub> )-GlcNS6S-<br>IdoA2S( $^2$ S <sub>O</sub> )-GlcNS6S-IdoA2S( $^2$ S <sub>O</sub> )-GlcNS6S-  | FGF1 and FGFR2                          | 2.80           |

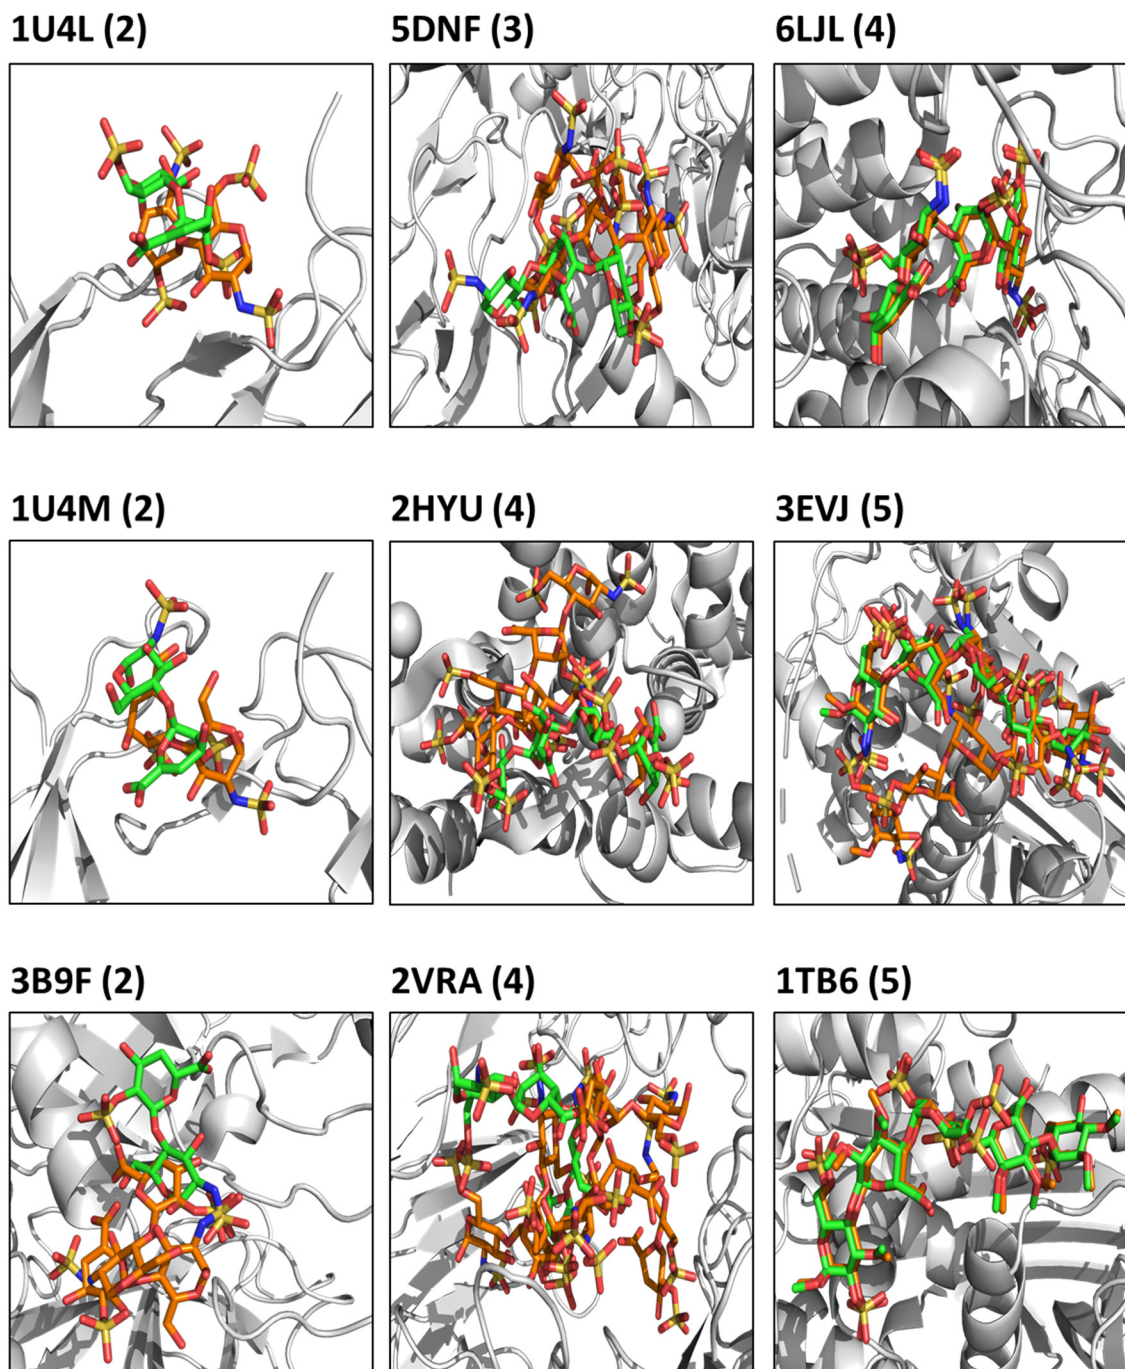

**Figure S4 (Part I).** Recapitulation of the native pose using the rigid docking protocol. Each sequence was redocked back into the crystal structure in triplicate using 100 GA runs, each being allowed 100,000 genetic operations. The top two poses from each replicate experiment were selected and compared by calculating the  $\text{RMSD}_{\text{AVERAGE}}$ ,  $\text{RMSD}_{\text{LOWEST}}$  and  $\text{RMSD}_{\text{INTRAPOSE}}$  (see **Figure 2** for definitions). Representative docking poses from the top 6 obtained for all 18 protein–Hp/HS oligosaccharide complexes are shown here. Redundant poses are not presented for clarity. Native poses in each both are shown in green, while docked poses are in orange.



**4R9W (5)**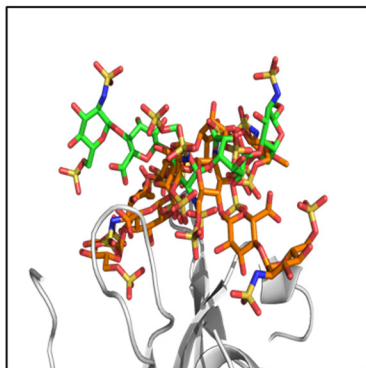**1XMN (6)**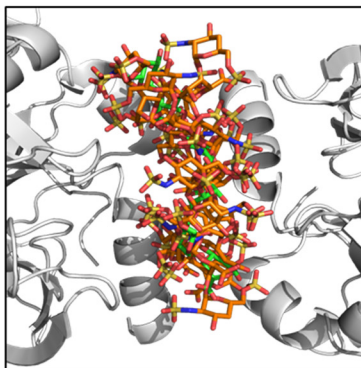**3INA (8)**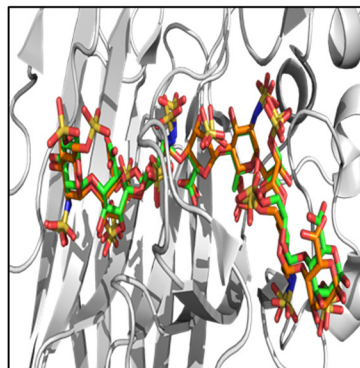**2HYV (5)**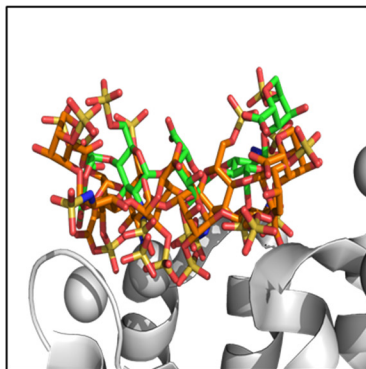**3UAN (6)**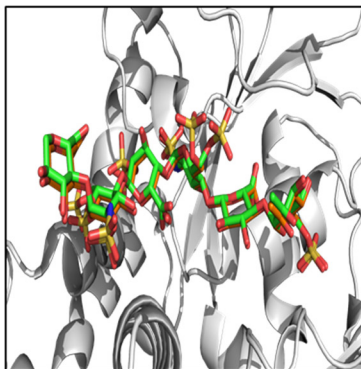**7B8I (8)**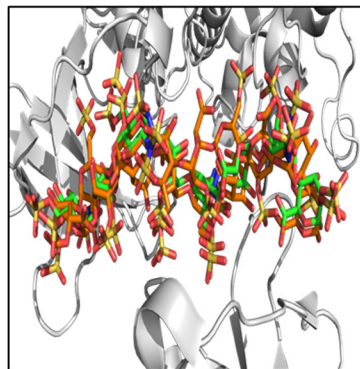**4AK2 (6)**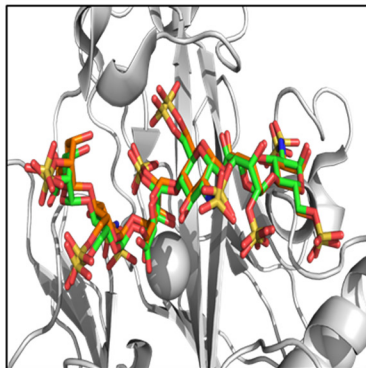**4C4N (6)**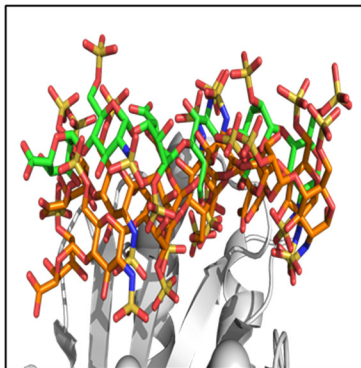**1E0O (10)**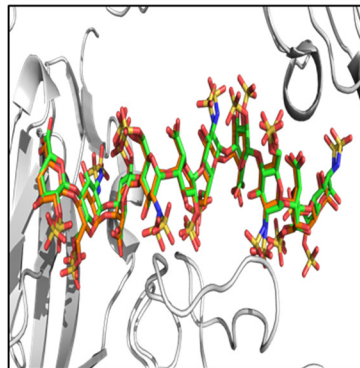

**Figure S4 (Part II).** Recapitulation of the native pose using the rigid docking protocol. Each sequence was redocked back into the crystal structure in triplicate using 100 GA runs, each being allowed 100,000 genetic operations. The top two poses from each replicate experiment were selected and compared by calculating the  $\text{RMSD}_{\text{AVERAGE}}$ ,  $\text{RMSD}_{\text{LOWEST}}$  and  $\text{RMSD}_{\text{INTRAPOSE}}$  (see **Figure 2** for definitions). Representative docking poses from the top 6 obtained for all 18 protein – Hp/HS oligosaccharide complexes are shown here. Redundant poses are not presented for clarity. Native poses in each both are shown in green, while docked poses are in orange.

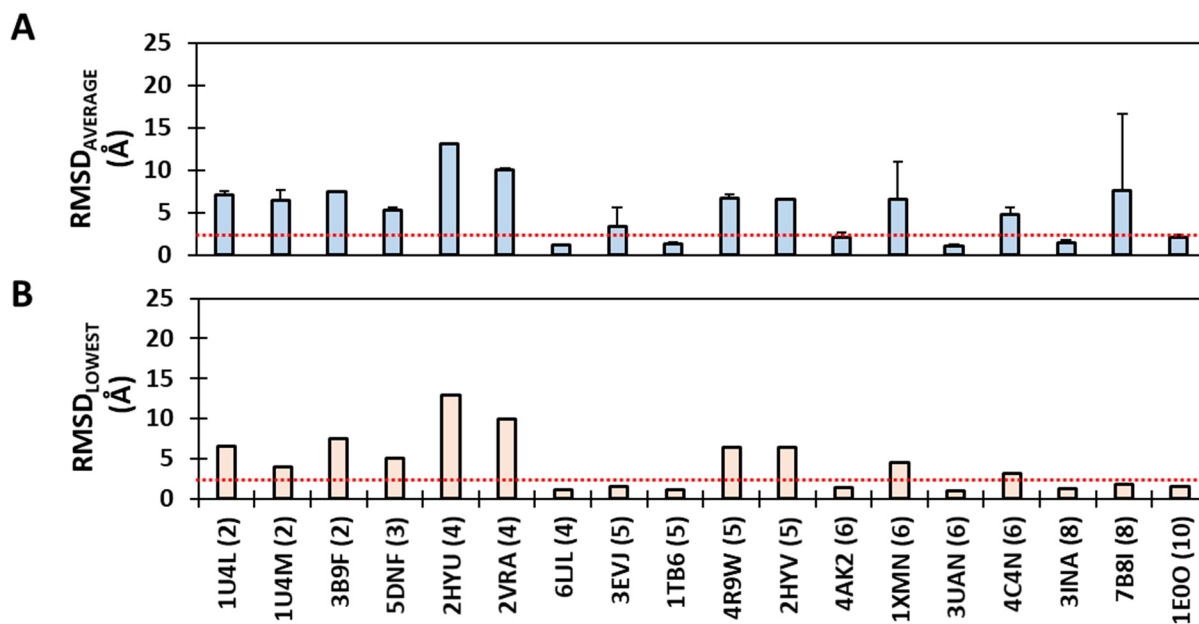

**Figure S5.** Recapitulation of the native pose using the rigid docking protocol using 300 GA runs. Each GA run was allowed 100,000 genetic operations. The top two poses from each replicate experiment were selected, compiled and used for analysis. The docking of each Hp/HS oligosaccharide onto its target protein was analyzed by calculating the RMSD<sub>AVERAGE</sub> and RMSD<sub>LOWEST</sub>. Plots of RMSD<sub>AVERAGE</sub> (A) and RMSD<sub>LOWEST</sub> (B) as a function IDs of the co-complex structures reported in the PDB. X-axis labels represent the PDB code followed by chain length in brackets. Red dotted line indicates the 2.5 Å cutoff.

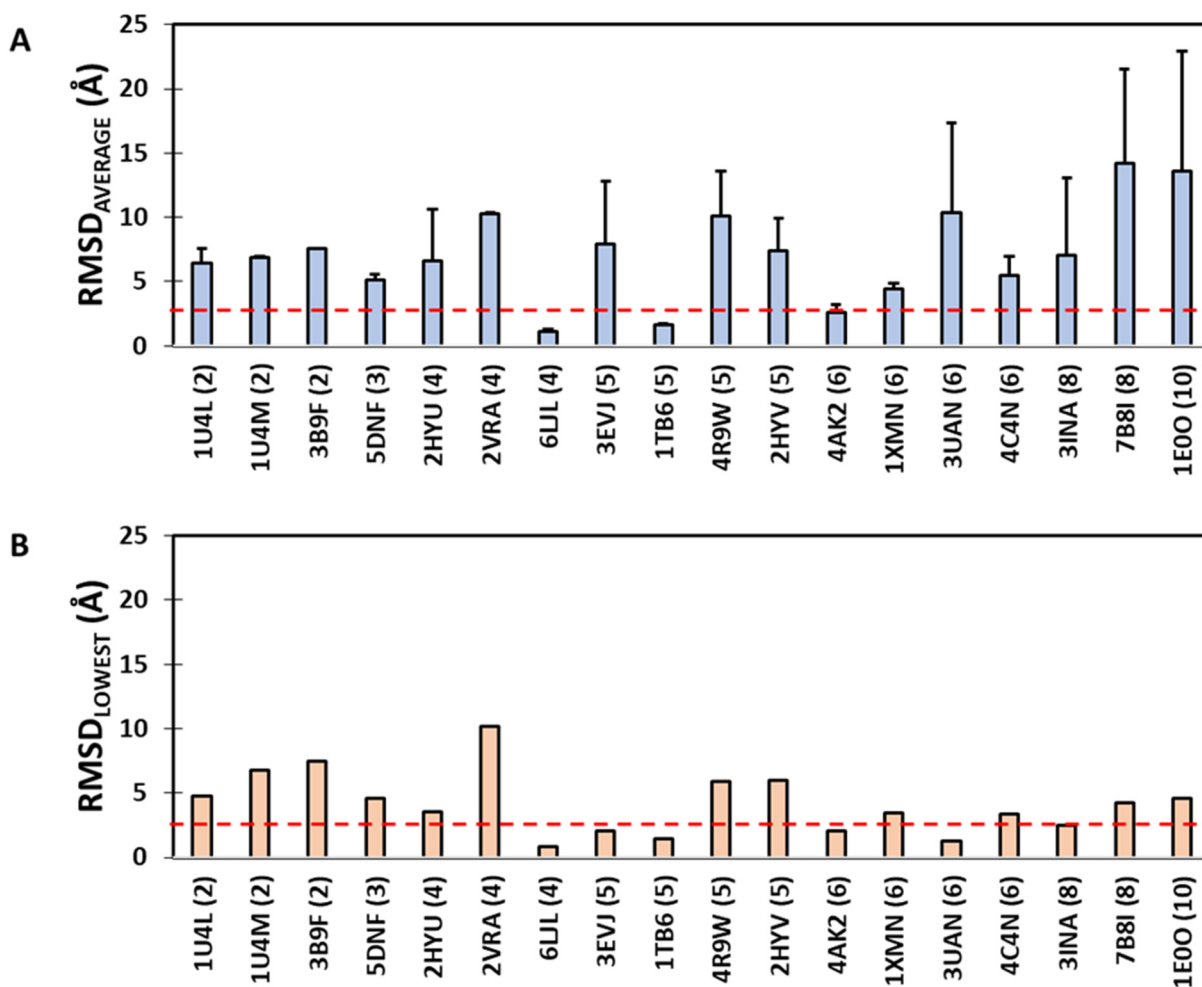

**Figure S6.** Recapitulation of the native pose using the flexible docking protocol using 300 GA runs. Each GA run was allowed 100,000 genetic operations. The top two poses from each replicate experiment were selected, compiled and used for analysis. The docking of each Hp/HS oligosaccharide onto its target protein was analyzed by calculating the RMSD<sub>AVERAGE</sub> and RMSD<sub>LOWEST</sub>. Plots of RMSD<sub>AVERAGE</sub> (A) and RMSD<sub>LOWEST</sub> (B) as a function IDs of the co-complex structures reported in the PDB. X-axis labels represent the PDB code followed by chain length in brackets. Red dotted line indicates the 2.5 Å cutoff.

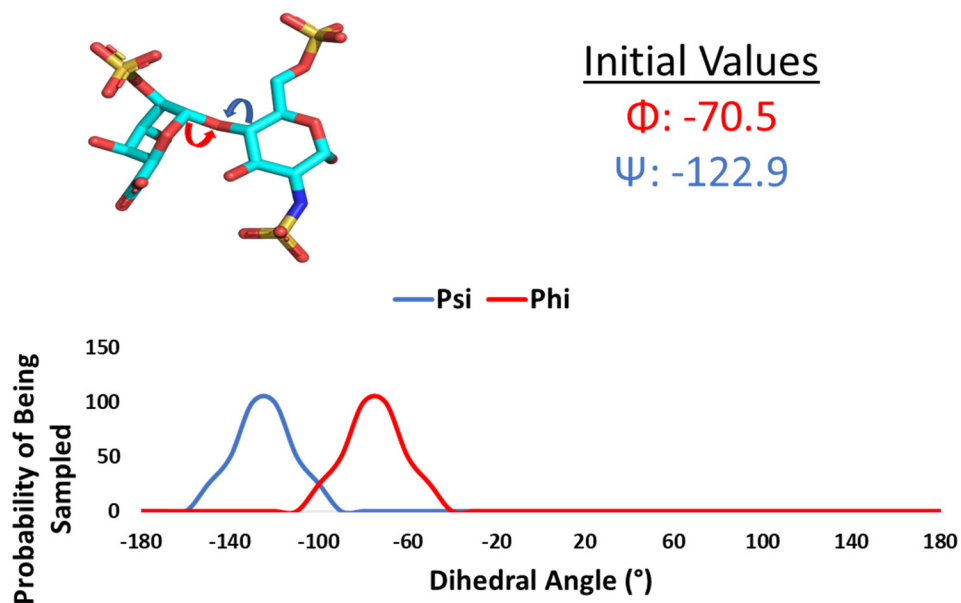

Example Torsional Histogram for  $\Phi$ :

Phi

O.3(C.3(C.2)) | C.3 | O.3 | C.3(C.3(O.3(C.3(O.3(1H))))

|   |   |   |   |   |    |    |     |     |    |    |   |   |
|---|---|---|---|---|----|----|-----|-----|----|----|---|---|
| 0 | 0 | 0 | 0 | 0 | 25 | 50 | 100 | 100 | 50 | 25 | 0 | 0 |
| 0 | 0 | 0 | 0 | 0 | 0  | 0  | 0   | 0   | 0  | 0  | 0 | 0 |
| 0 | 0 | 0 | 0 | 0 | 0  | 0  | 0   | 0   | 0  |    |   |   |

- 1) Torsion name
- 2) Four atoms specifying the torsion. To specify a unique atom, start with that atom first, then include atoms connected directly to the atom of interest by using parentheses.
- 3) A list of bins that represents the degree range starting from -180 to 180. The number in each bin is the probability that an angle in that bin will be sampled.

**Figure S7.** An example showing the torsional probability distribution function used in this work for semi-rigid docking protocol.

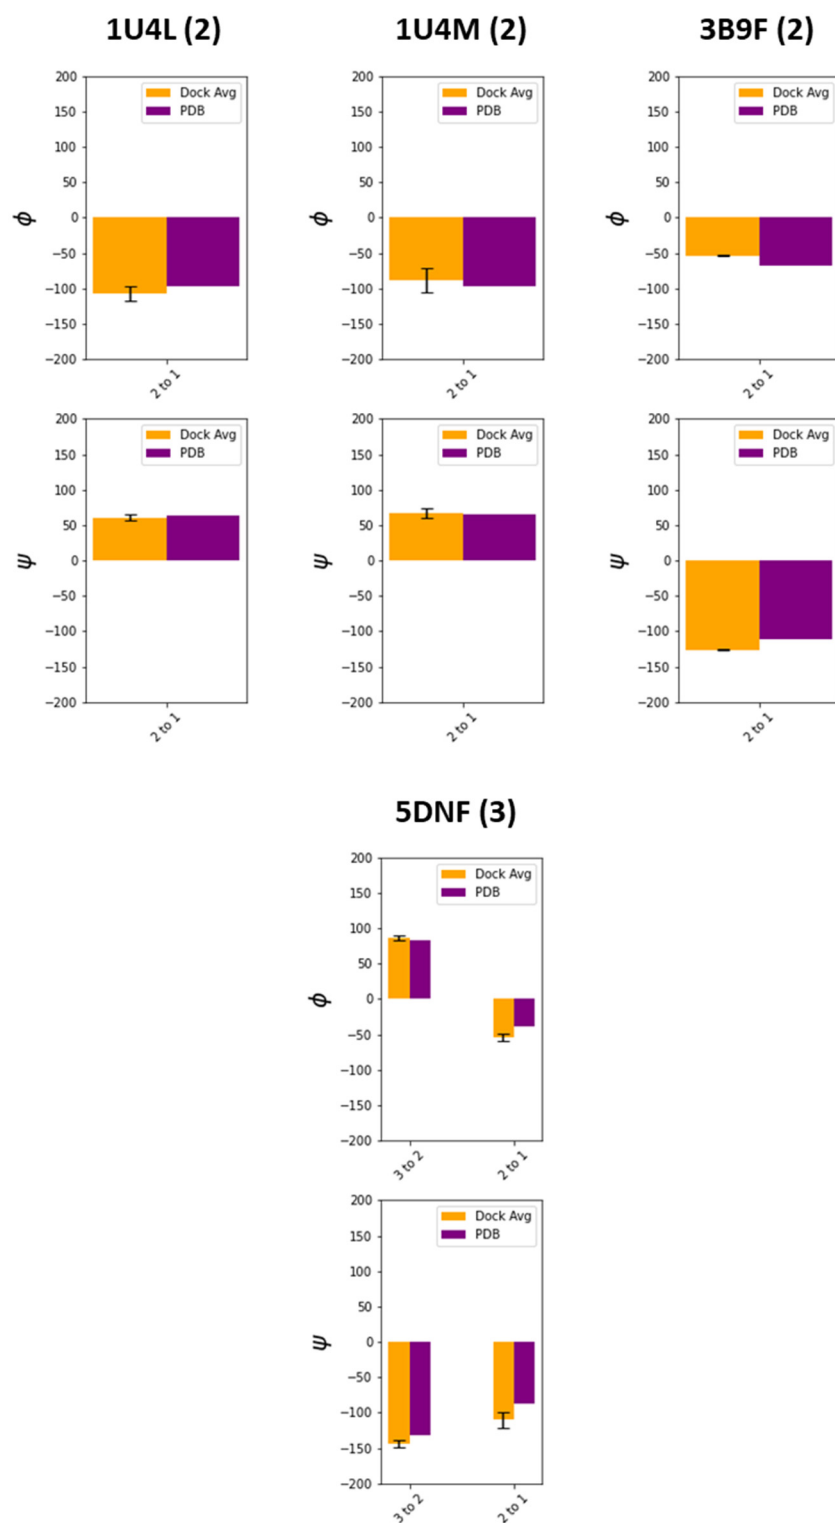

**Figure S8.** Comparison of the  $\Phi/\Psi$  in the native pose with that observed following semi-rigid docking for two disaccharides and one trisaccharide of the 18 co-complexes studied in this work. Reducing end residue is labeled as 1 followed by residue labeling in increasing order. Glycosidic linkages are depicted as 1 $\rightarrow$ 2, 2 $\rightarrow$ 3, and so on.

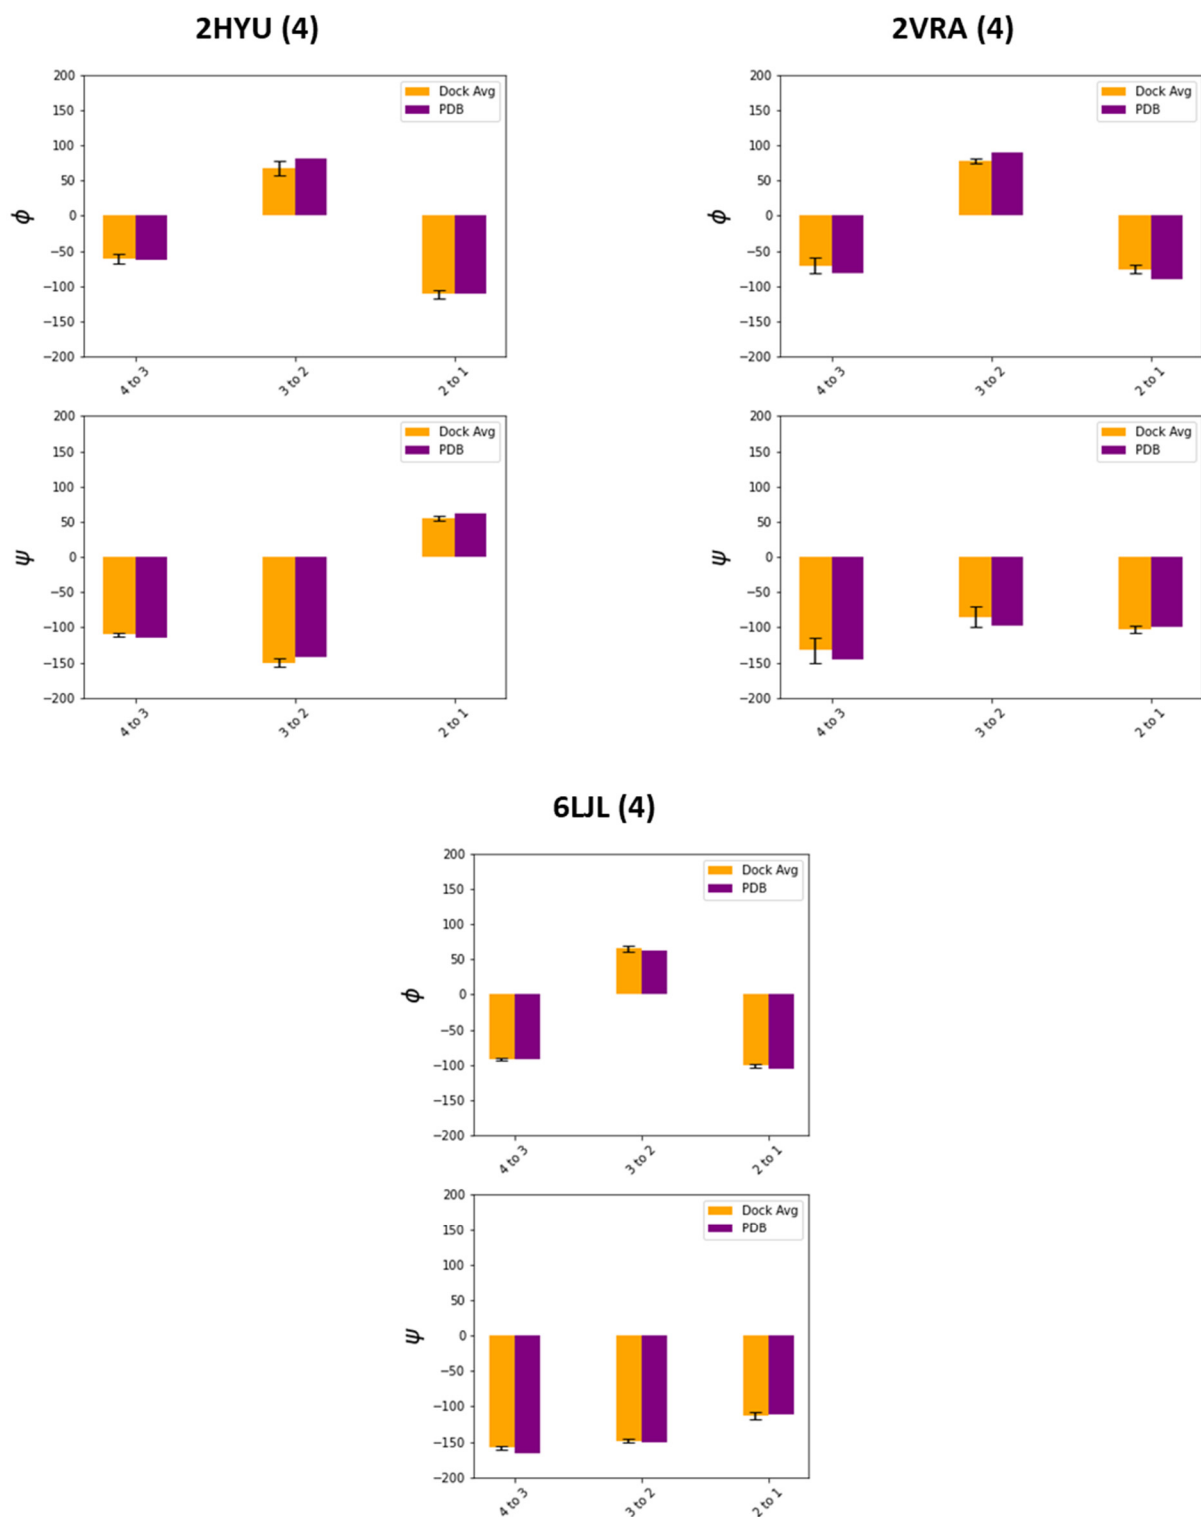

**Figure S9.** Comparison of the  $\Phi/\Psi$  in the native pose with that observed following semi-rigid docking for three tetrasaccharides of the 18 co-complexes studied in this work. Reducing end residue is labeled as 1 followed by residue labeling in increasing order. Glycosidic linkages are depicted as 1→2, 2→3, and so on.

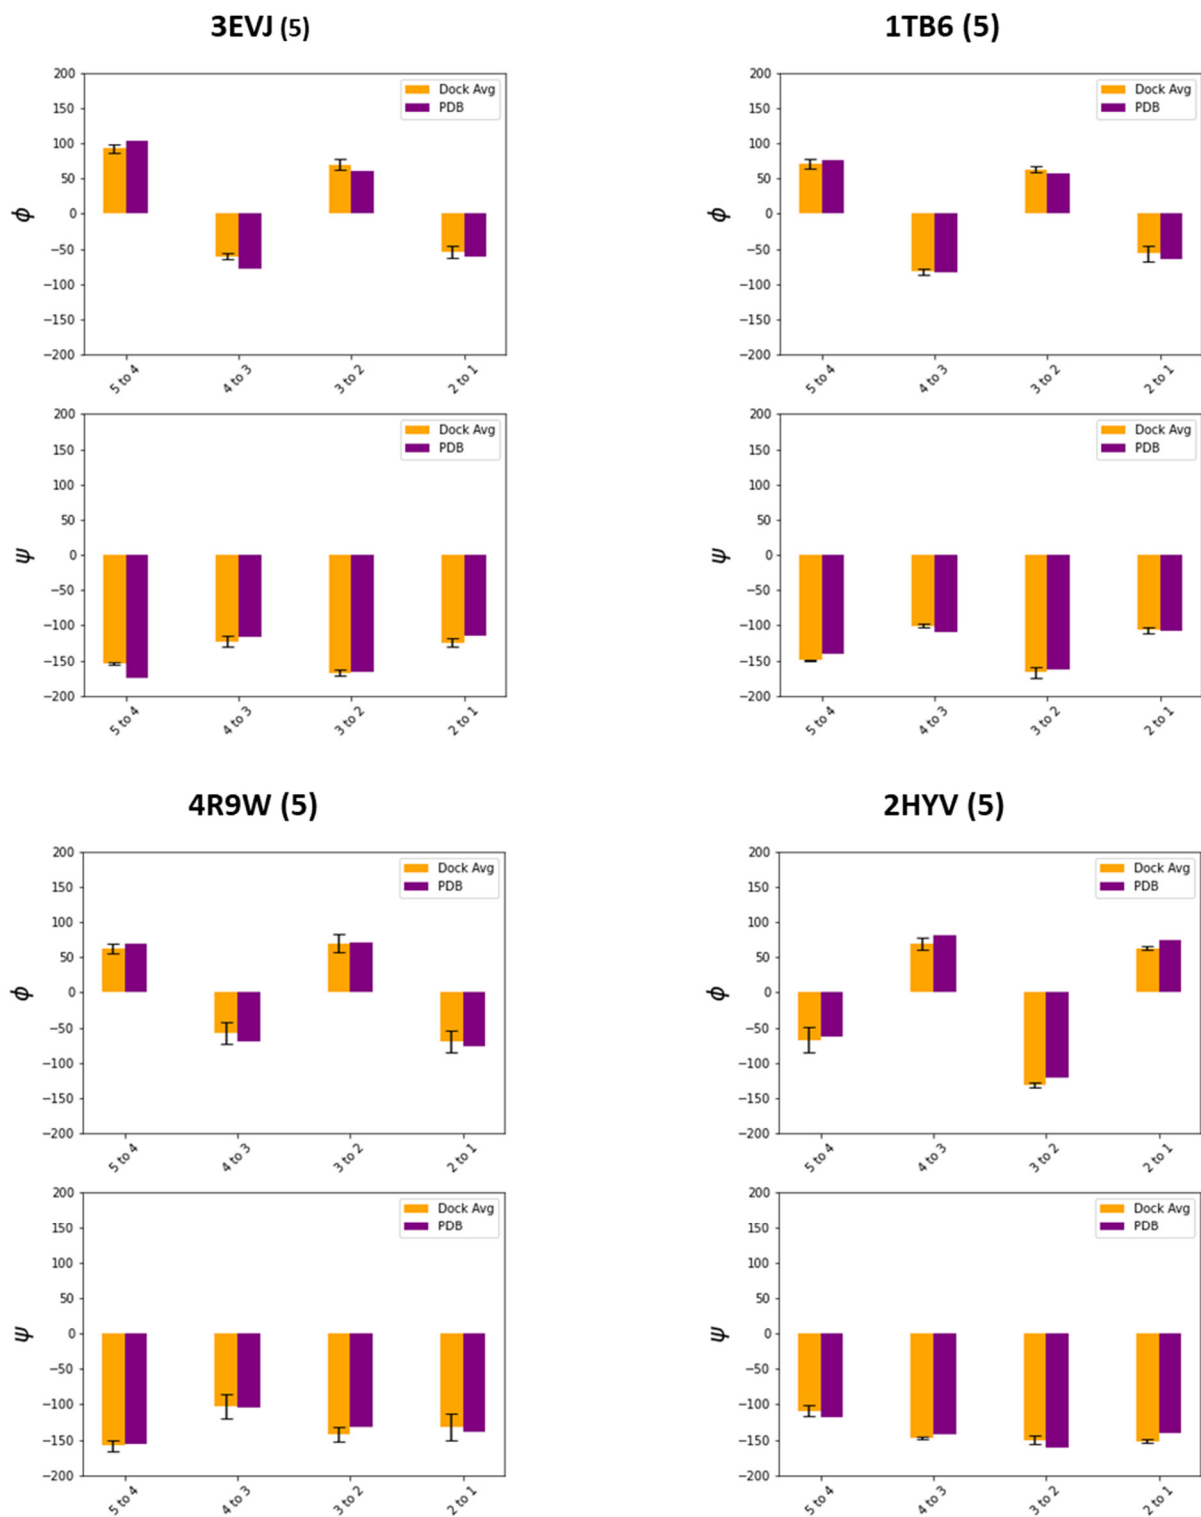

**Figure S10.** Comparison of the  $\Phi/\Psi$  in the native pose with that observed following semi-rigid docking for four pentasaccharides of the 18 co-complexes studied in this work. Reducing end residue is labeled as 1 followed by residue labeling in increasing order. Glycosidic linkages are depicted as 1 $\rightarrow$ 2, 2 $\rightarrow$ 3, and so on.

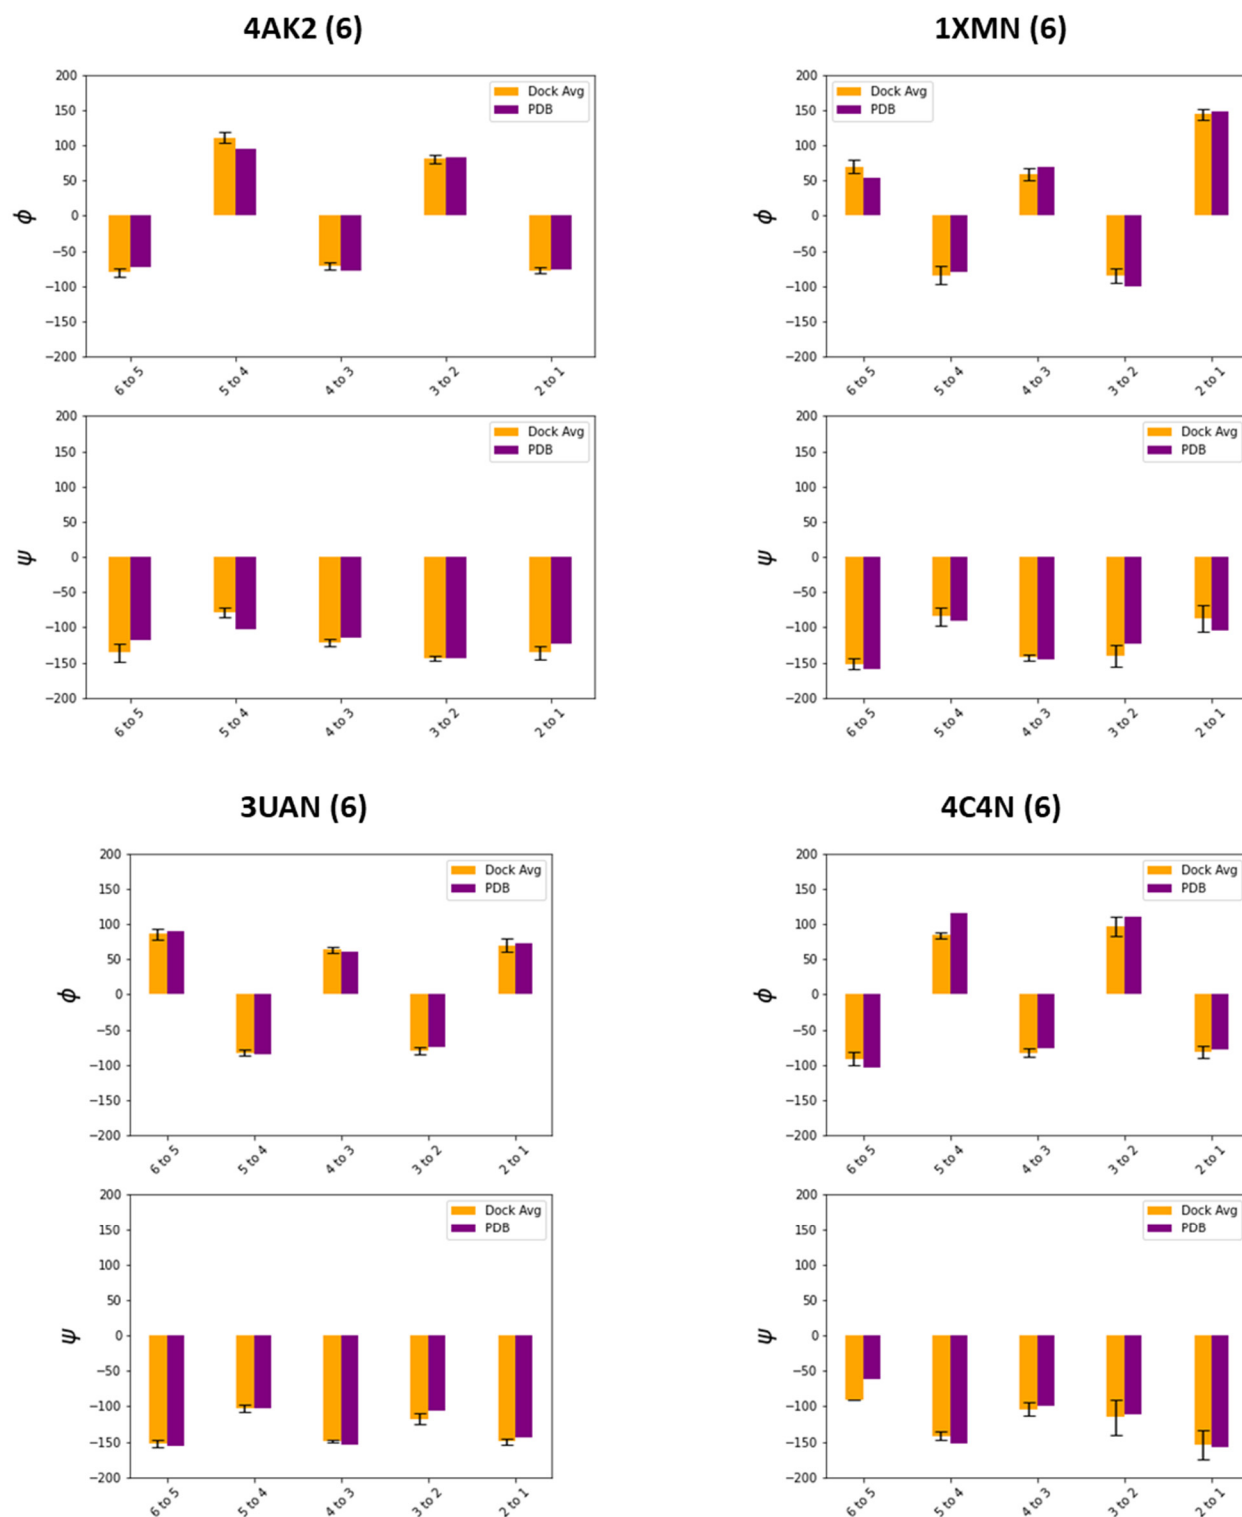

**Figure S11.** Comparison of the  $\Phi/\Psi$  in the native pose with that observed following semi-rigid docking for four hexasaccharides of the 18 co-complexes studied in this work. Reducing end residue is labeled as 1 followed by residue labeling in increasing order. Glycosidic linkages are depicted as 1→2, 2→3, and so on.



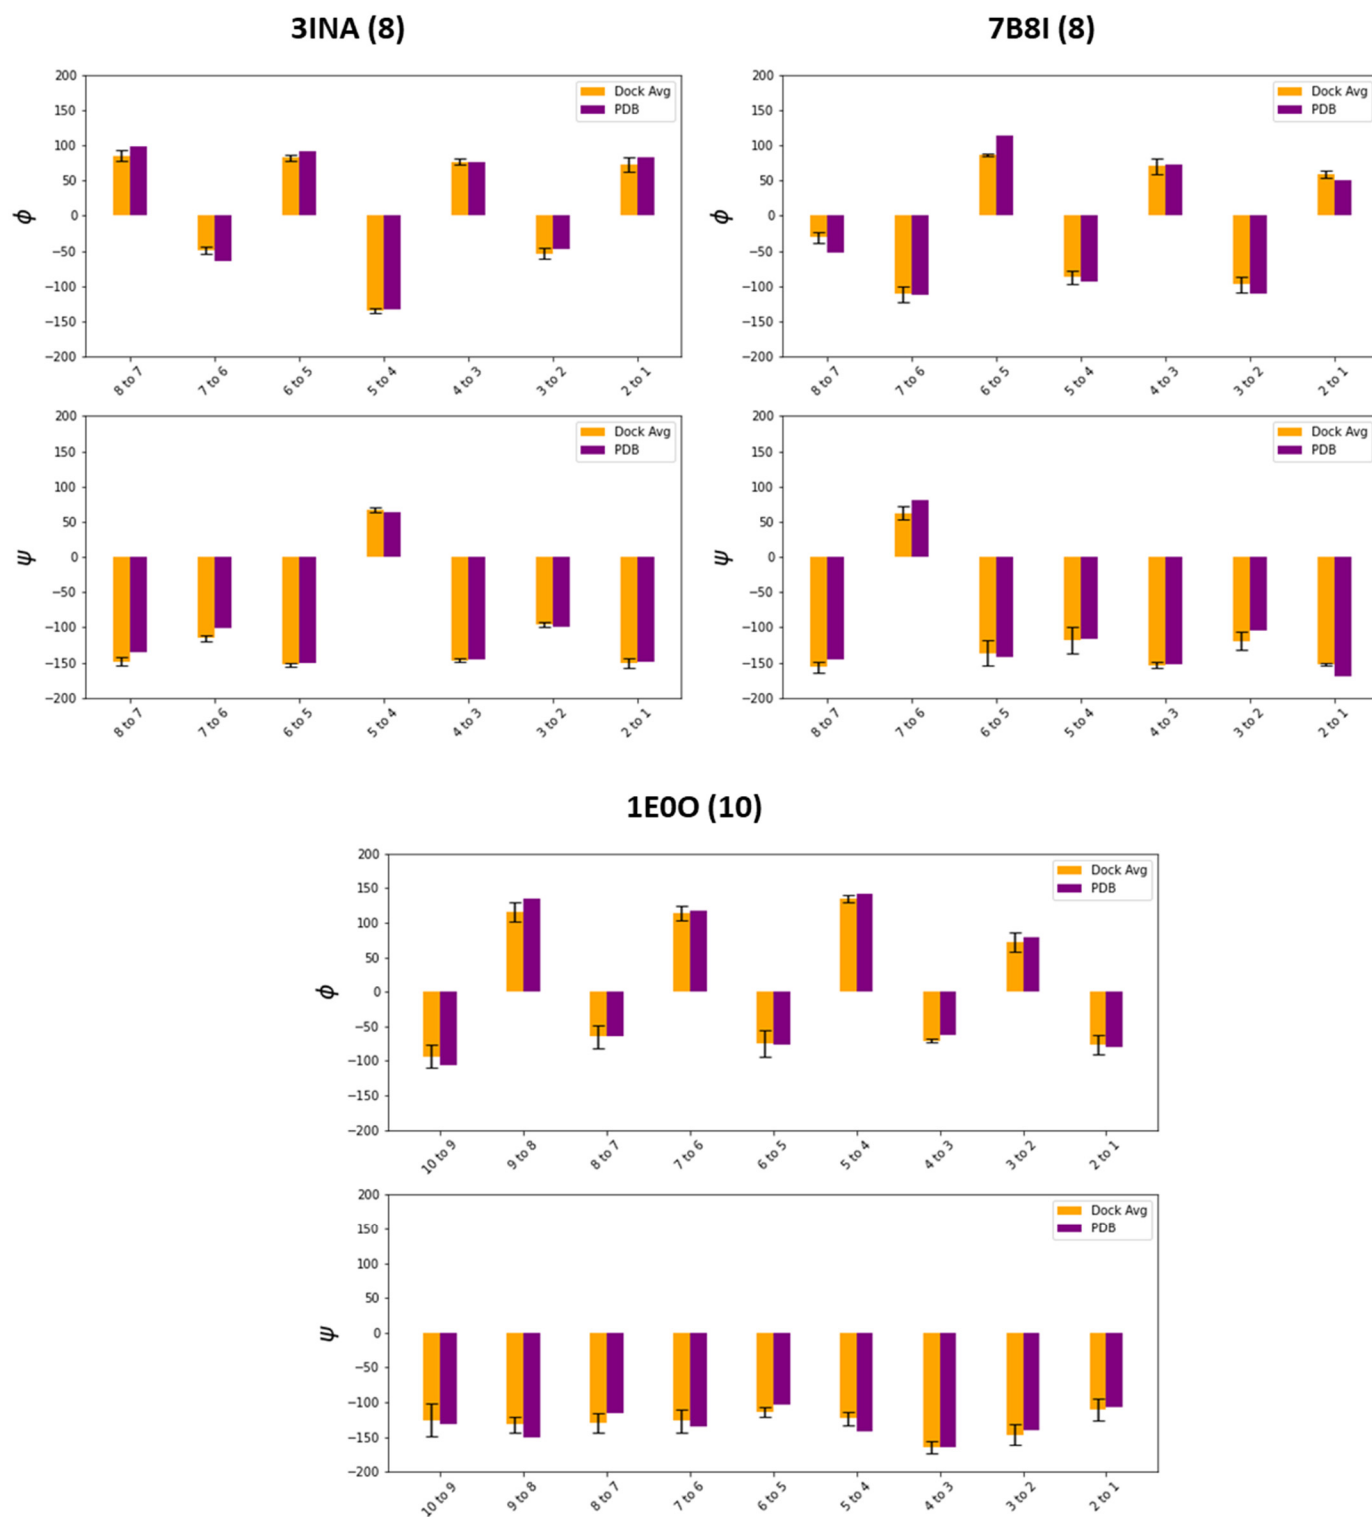

**Figure S12.** Comparison of the  $\Phi/\Psi$  in the native pose with that observed following semi-rigid docking for two octasaccharides and one deca-saccharide of the 18 co-complexes studied in this work. Reducing end residue is labeled as 1 followed by residue labeling in increasing order. Glycosidic linkages are depicted as 1 $\rightarrow$ 2, 2 $\rightarrow$ 3, and so on.

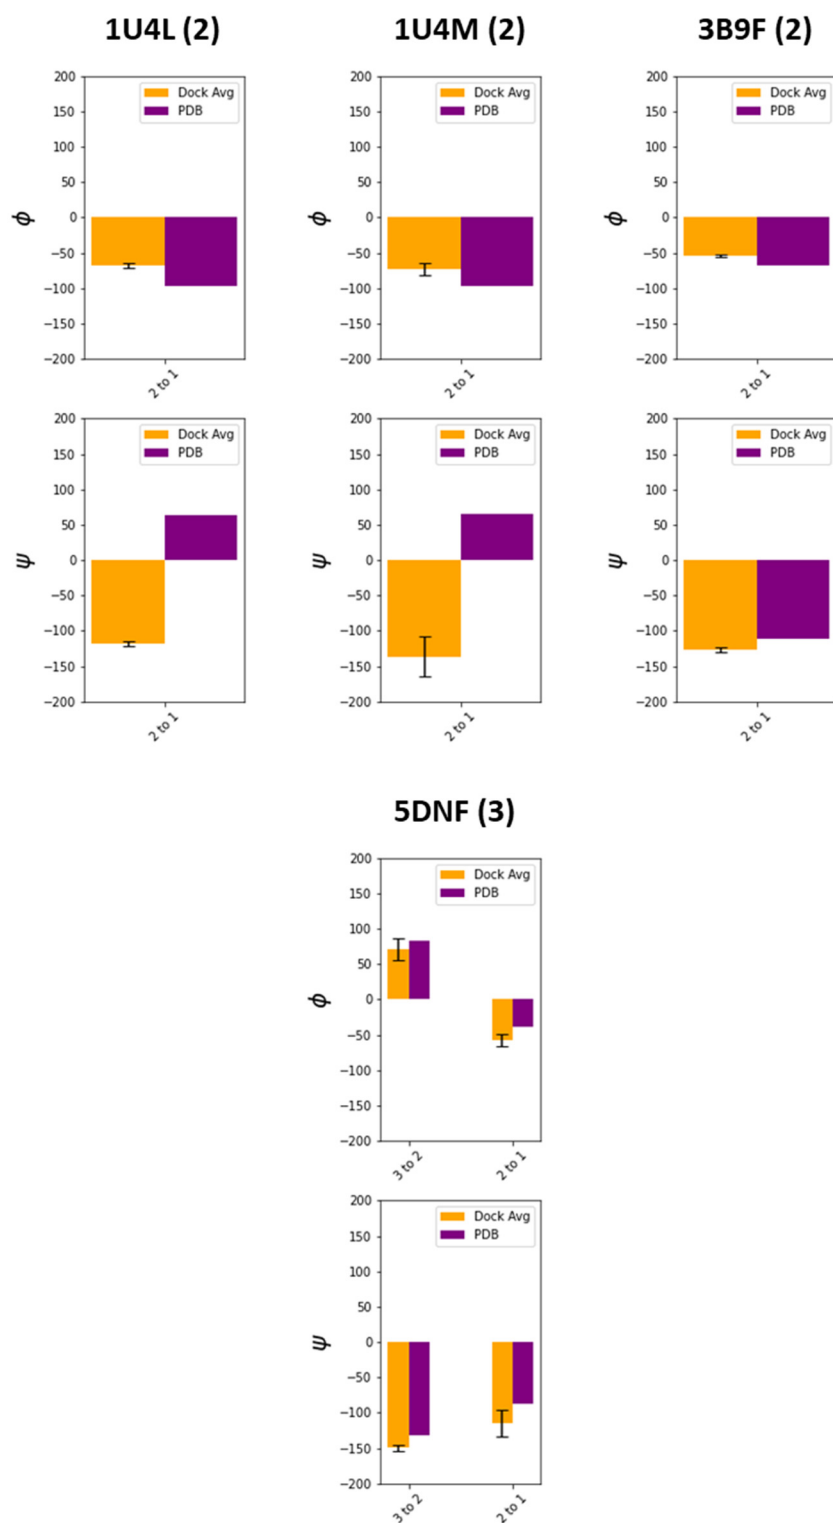

**Figure S13.** Comparison of the  $\Phi/\Psi$  in the native pose with that observed following flexible docking for two disaccharides and one trisaccharide of the 18 co-complexes studied in this work. Reducing end residue is labeled as 1 followed by residue labeling in increasing order. Glycosidic linkages are depicted as 1 $\rightarrow$ 2, 2 $\rightarrow$ 3, and so on.

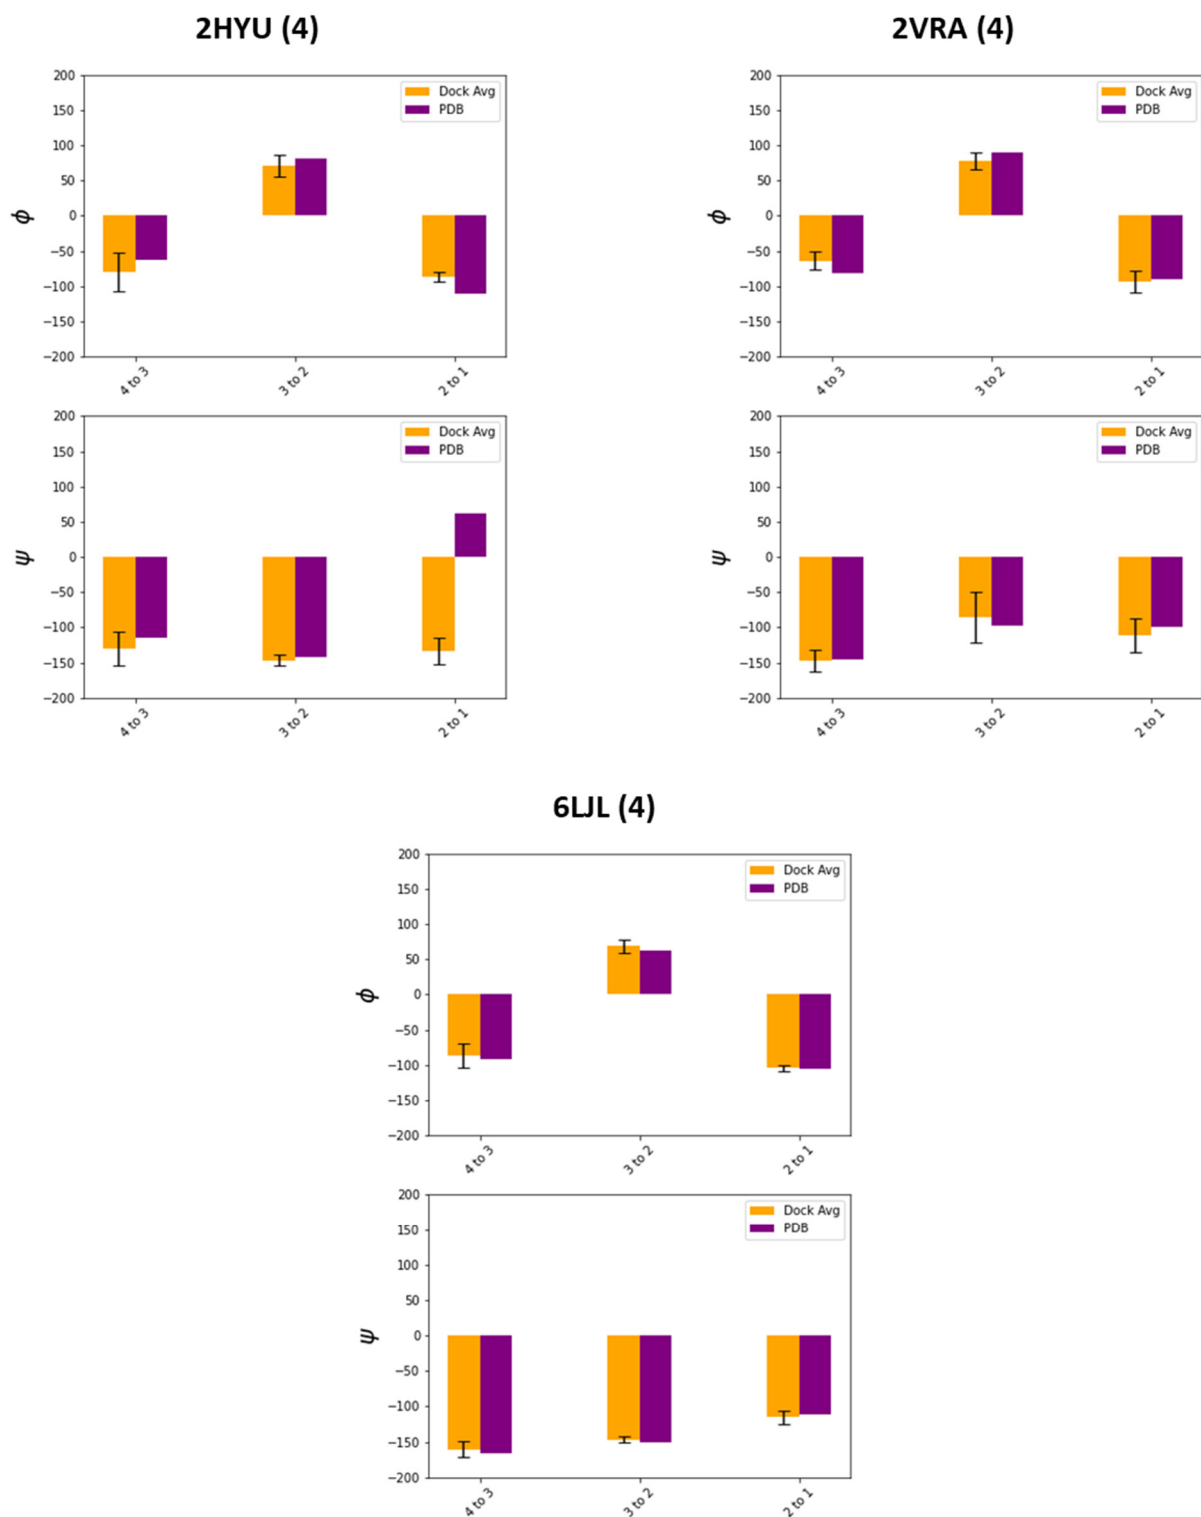

**Figure S14.** Comparison of the  $\Phi/\Psi$  in the native pose with that observed following flexible docking for three tetrasaccharides of the 18 co-complexes studied in this work. Reducing end residue is labeled as 1 followed by residue labeling in increasing order. Glycosidic linkages are depicted as 1→2, 2→3, and so on.

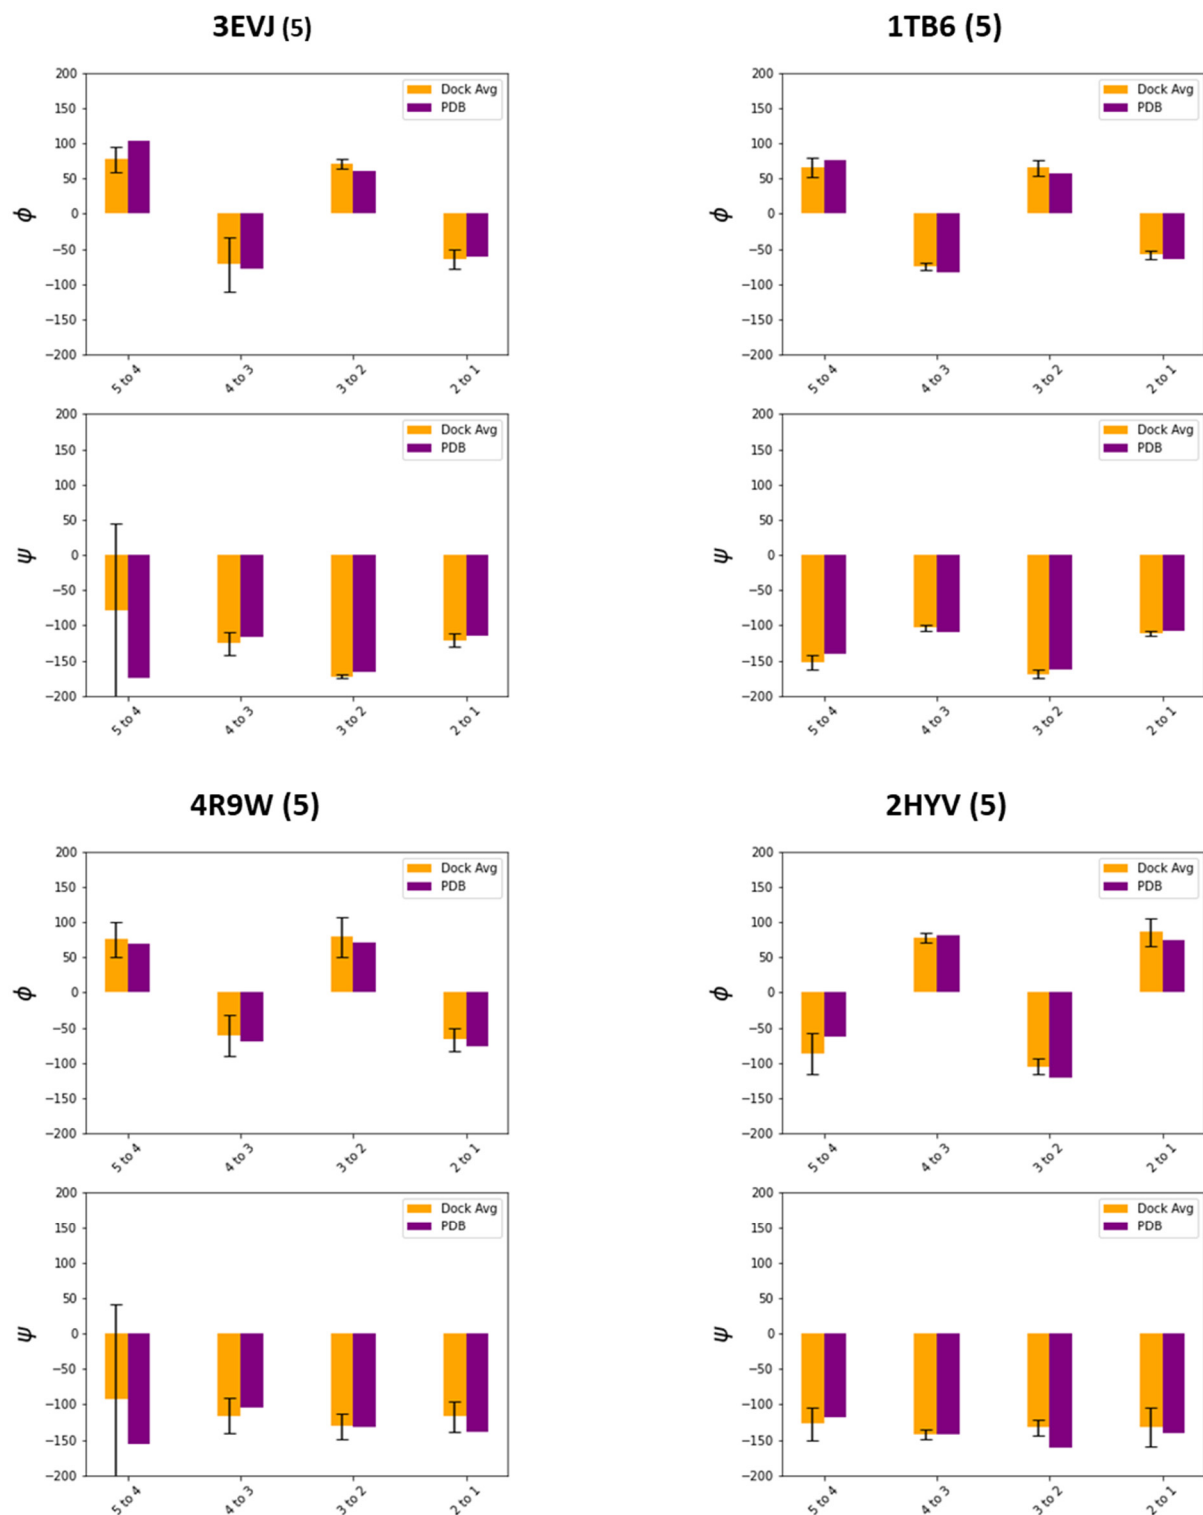

**Figure S15.** Comparison of the  $\Phi/\Psi$  in the native pose with that observed following flexible docking for four pentasaccharides of the 18 co-complexes studied in this work. Reducing end residue is labeled as 1 followed by residue labeling in increasing order. Glycosidic linkages are depicted as 1→2, 2→3, and so on.

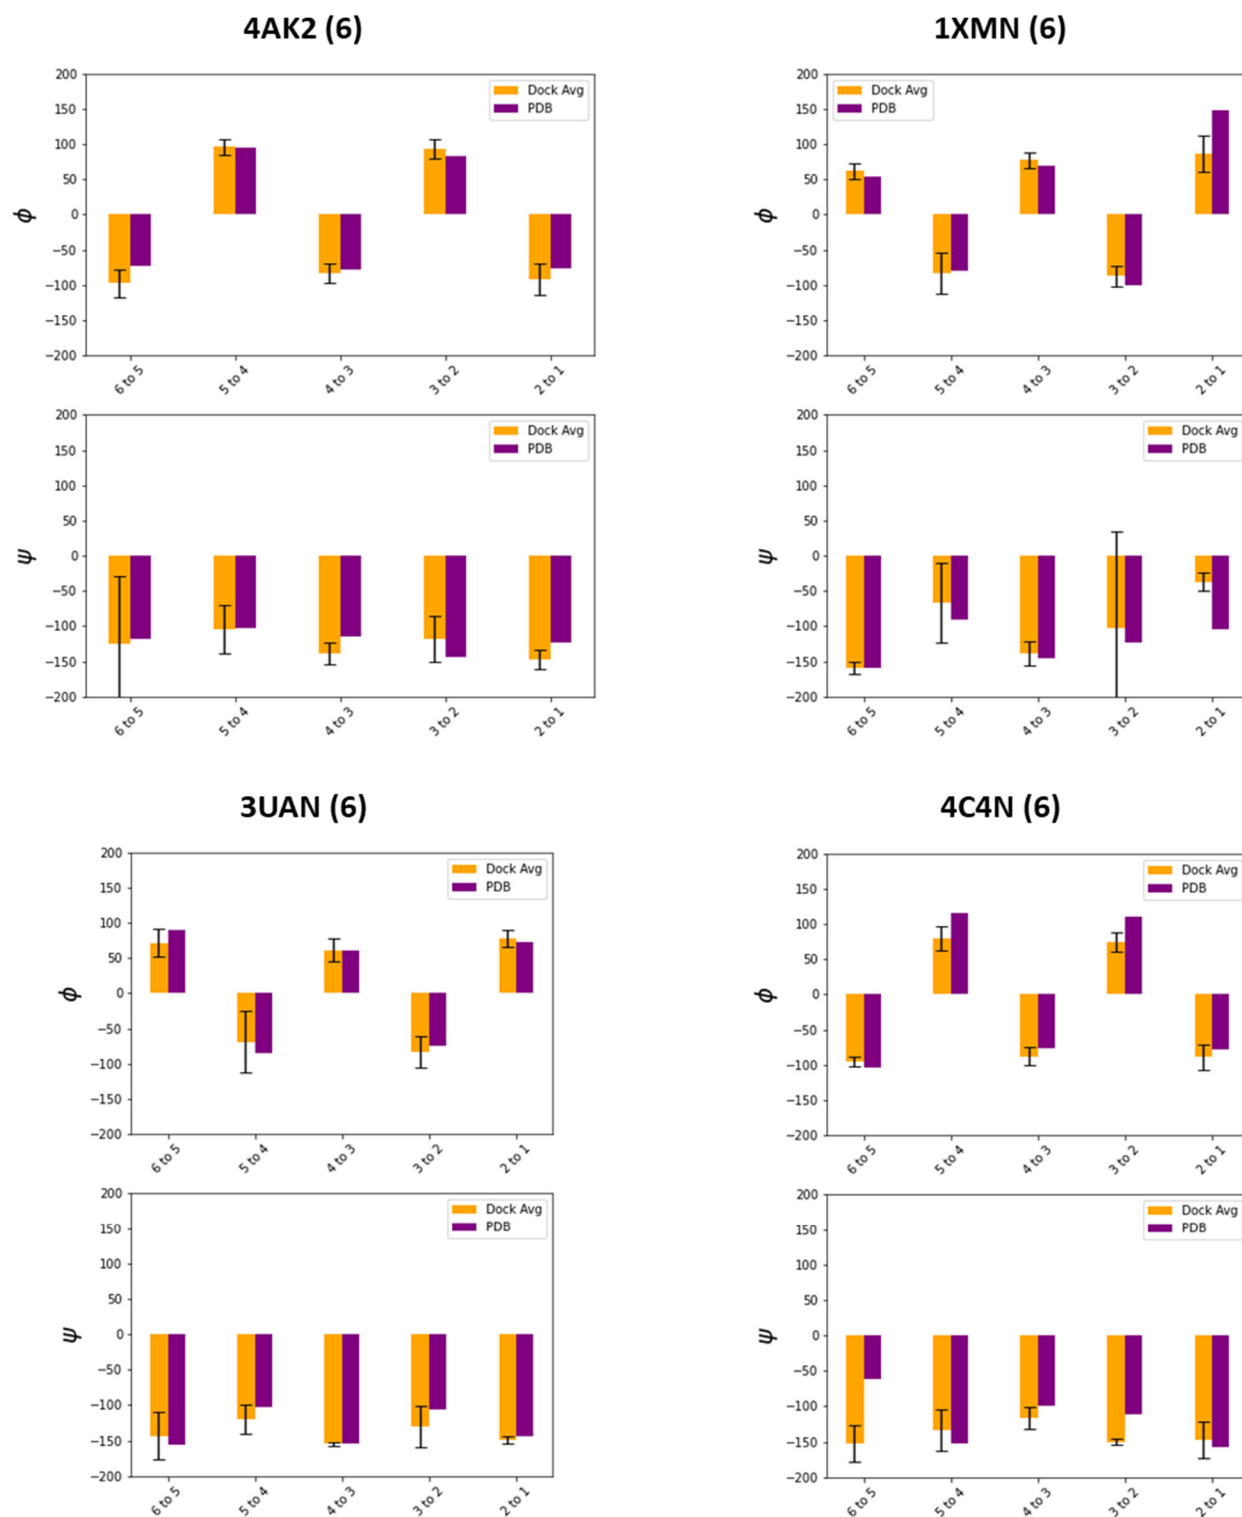

**Figure S16.** Comparison of the  $\Phi/\Psi$  in the native pose with that observed following flexible docking for four hexasaccharides of the 18 co-complexes studied in this work. Reducing end residue is labeled as 1 followed by residue labeling in increasing order. Glycosidic linkages are depicted as 1→2, 2→3, and so on.

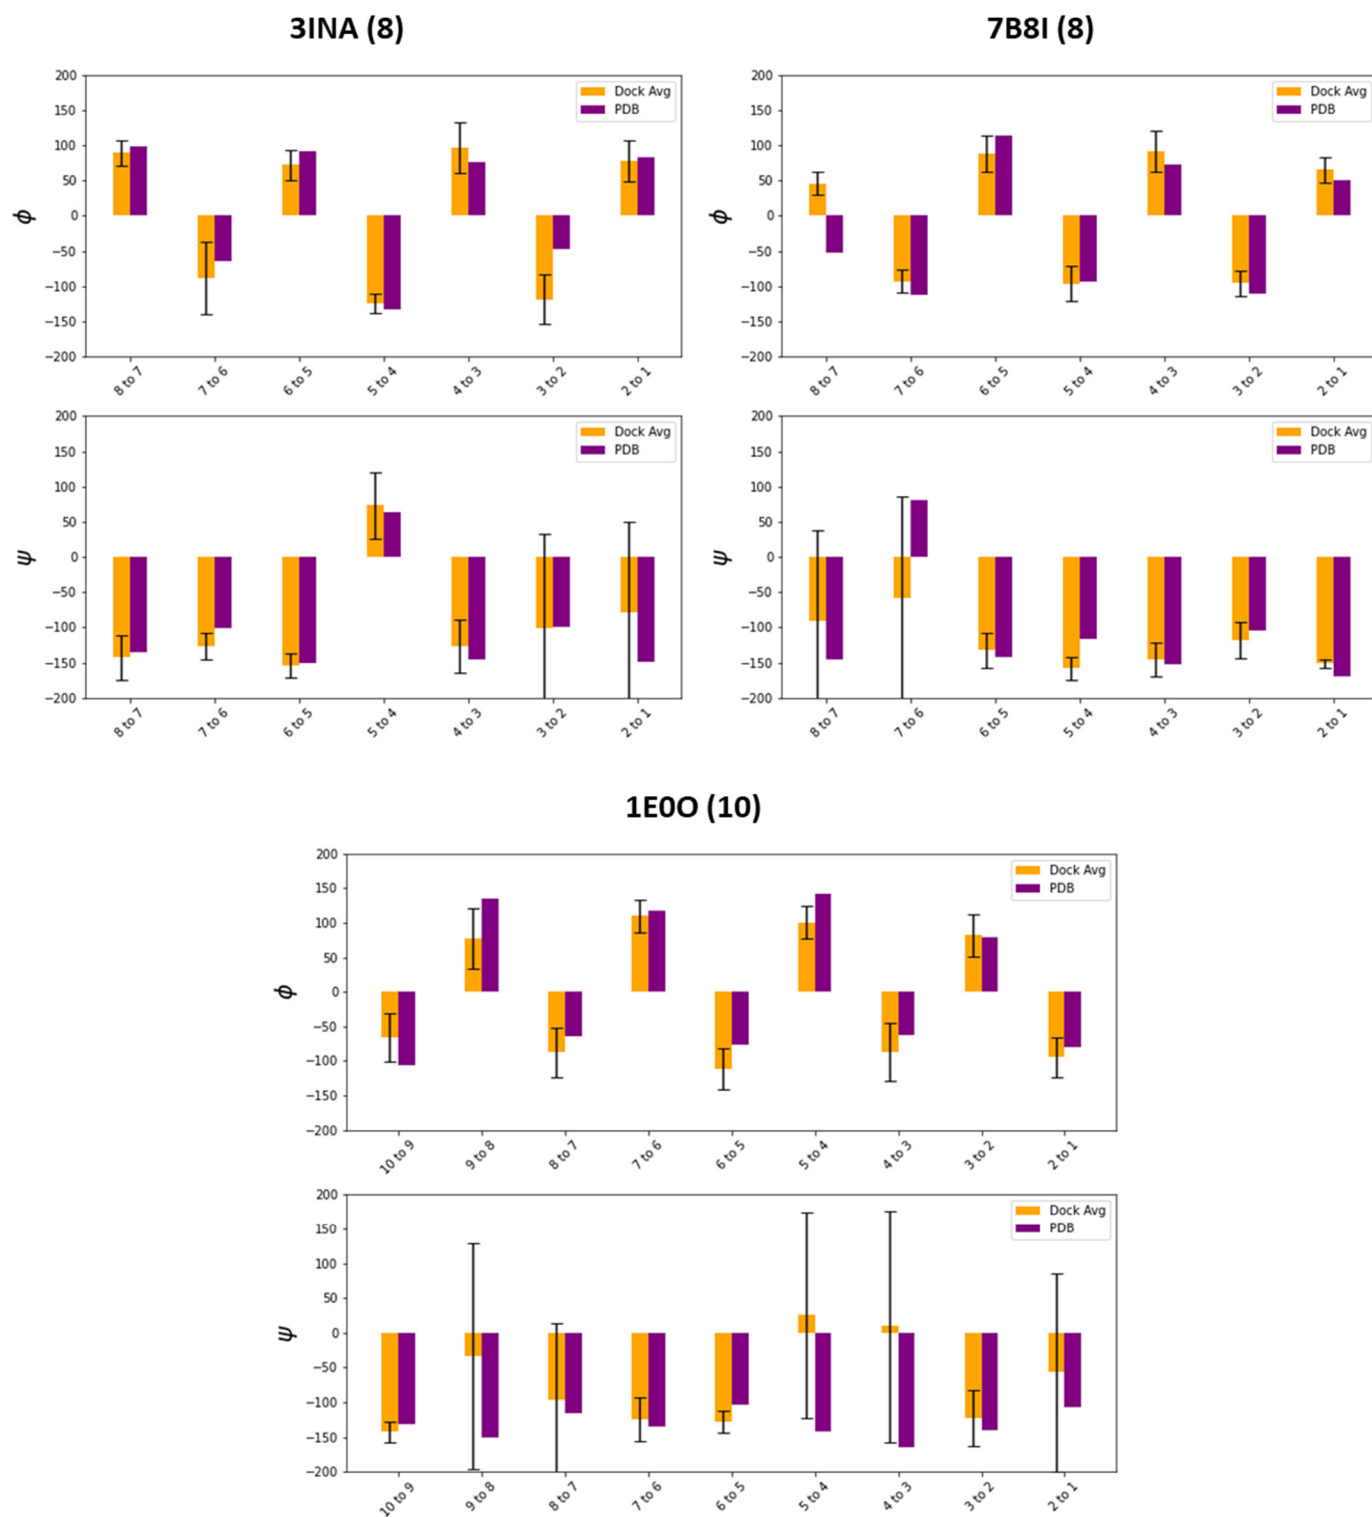

**Figure S17.** Comparison of the  $\Phi/\Psi$  in the native pose with that observed following flexible docking for two octasaccharides and one decasaccharide of the 18 co-complexes studied in this work. Reducing end residue is labeled as 1 followed by residue labeling in increasing order. Glycosidic linkages are depicted as 1 $\rightarrow$ 2, 2 $\rightarrow$ 3, and so on.

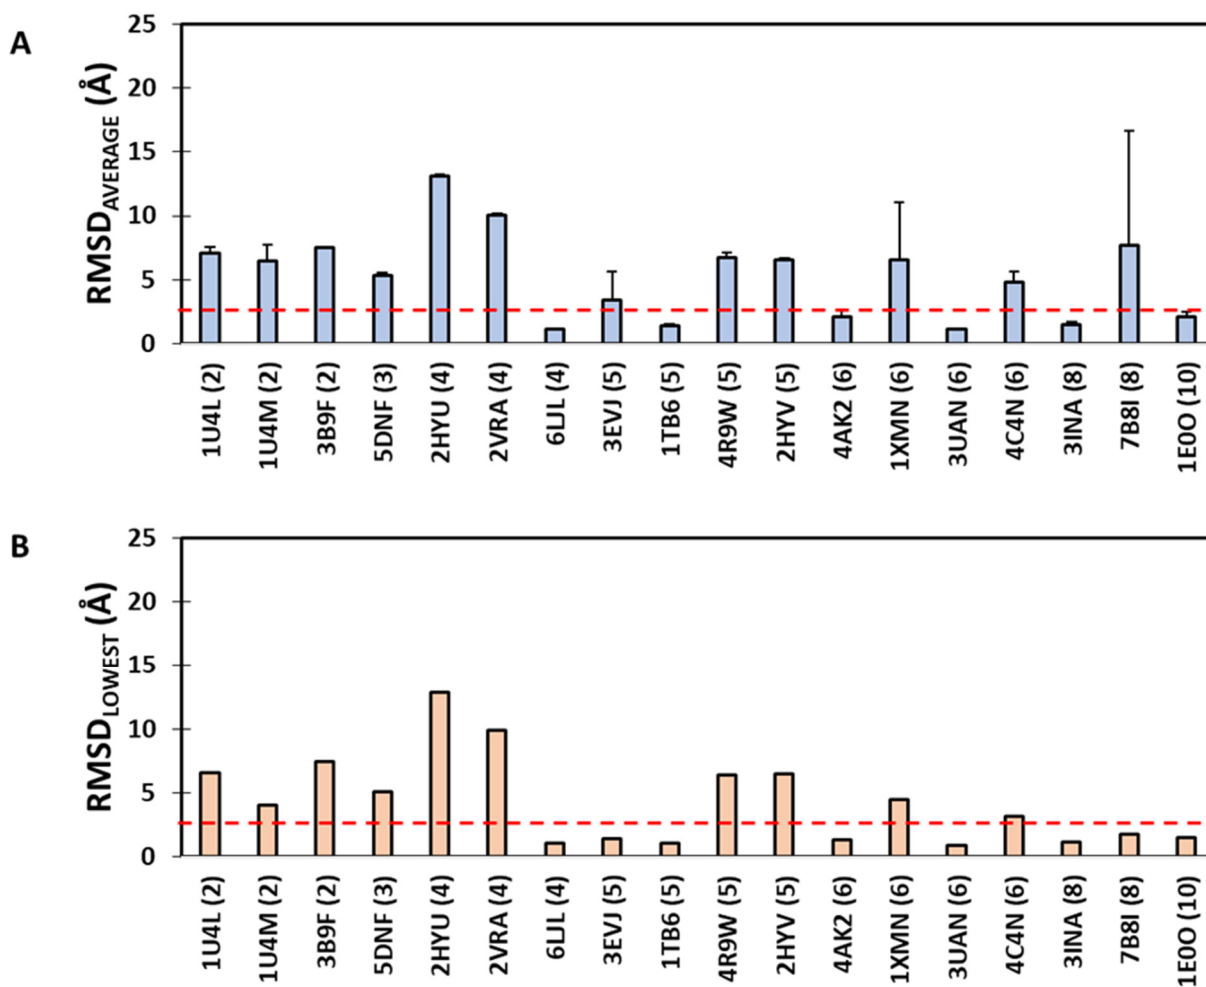

**Figure S18.** Recapitulation of the native pose using the semi-rigid docking protocol using 300 GA runs. Each GA run was allowed 100,000 genetic operations. The top two poses from each replicate experiment were selected, compiled and used for analysis. The docking of each Hp/HS oligosaccharide onto its target protein was analyzed by calculating the RMSD<sub>AVERAGE</sub> and RMSD<sub>LOWEST</sub>. Plots of RMSD<sub>AVERAGE</sub> (A) and RMSD<sub>LOWEST</sub> (B) as a function IDs of the co-complex structures reported in the PDB. X-axis labels represent the PDB code followed by chain length in brackets. Red dotted line indicates the 2.5 Å cutoff.

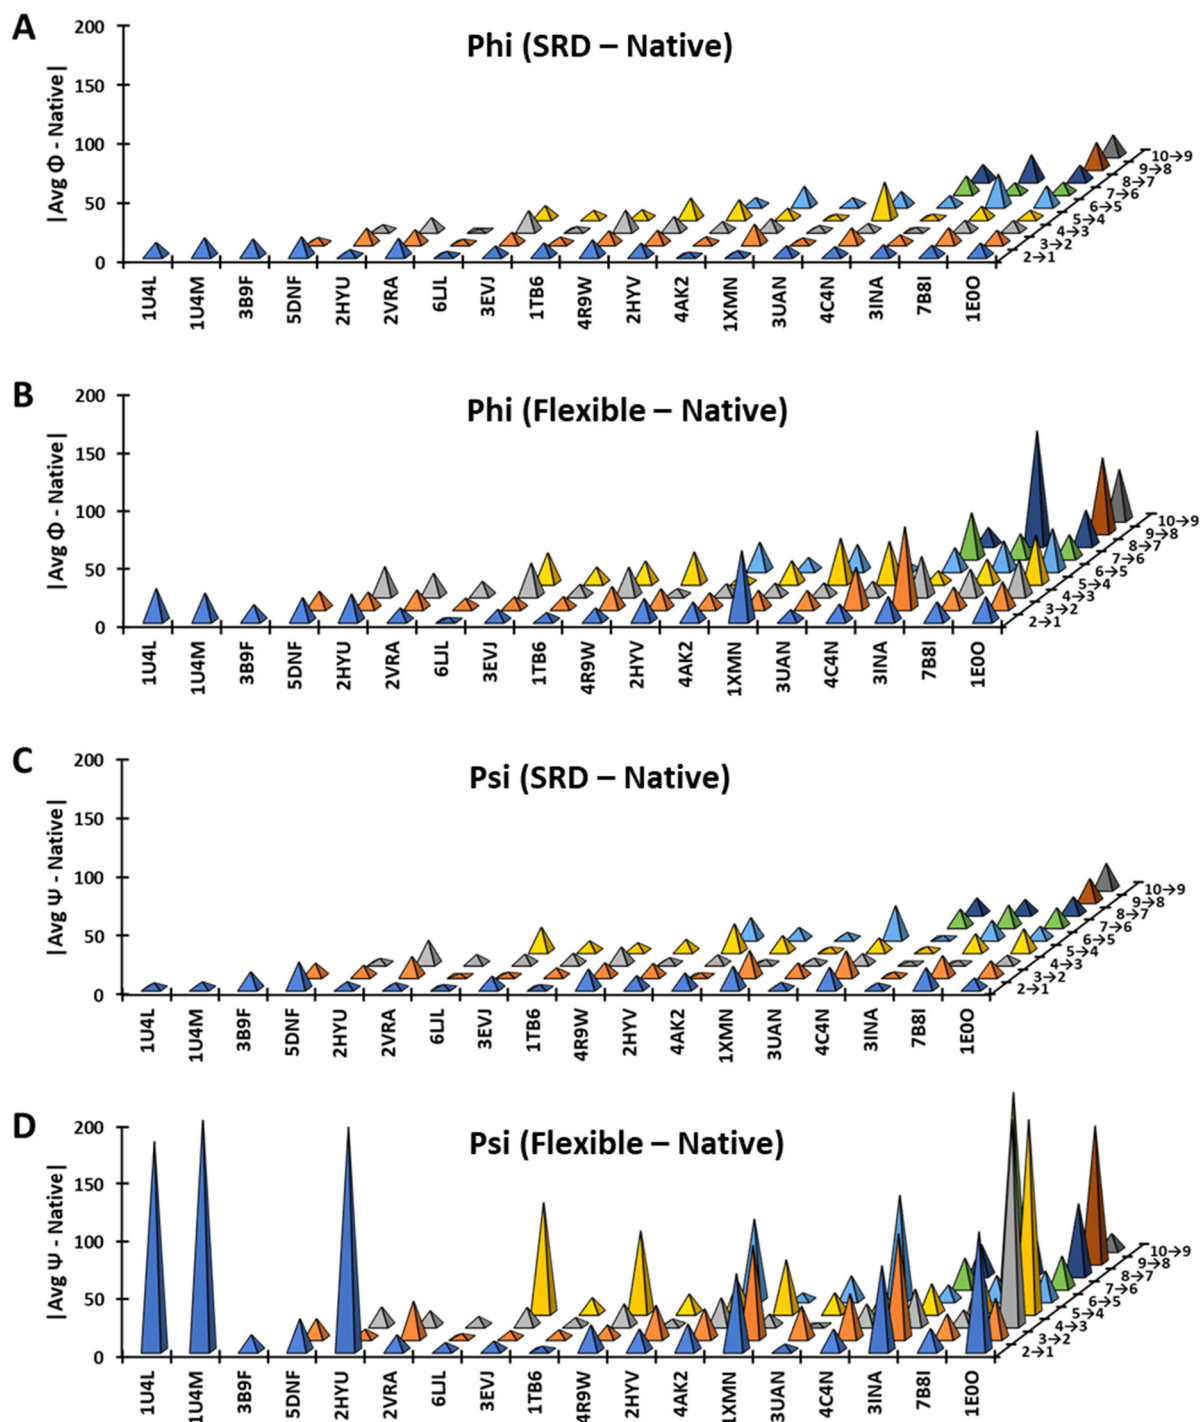

**Figure S19.** Comparison of changes in  $\Phi/\Psi$  from their values in the native state following for semi-rigid and flexible dockings. Note: Change in  $\Phi/\Psi$  can be either positive or negative, yet only the degree of change is depicted here. A) Change in  $\Phi$  following SRD. B) Change in  $\Phi$  following flexible docking. C) Change in  $\Psi$  following SRD. D) Change in  $\Psi$  following flexible docking.



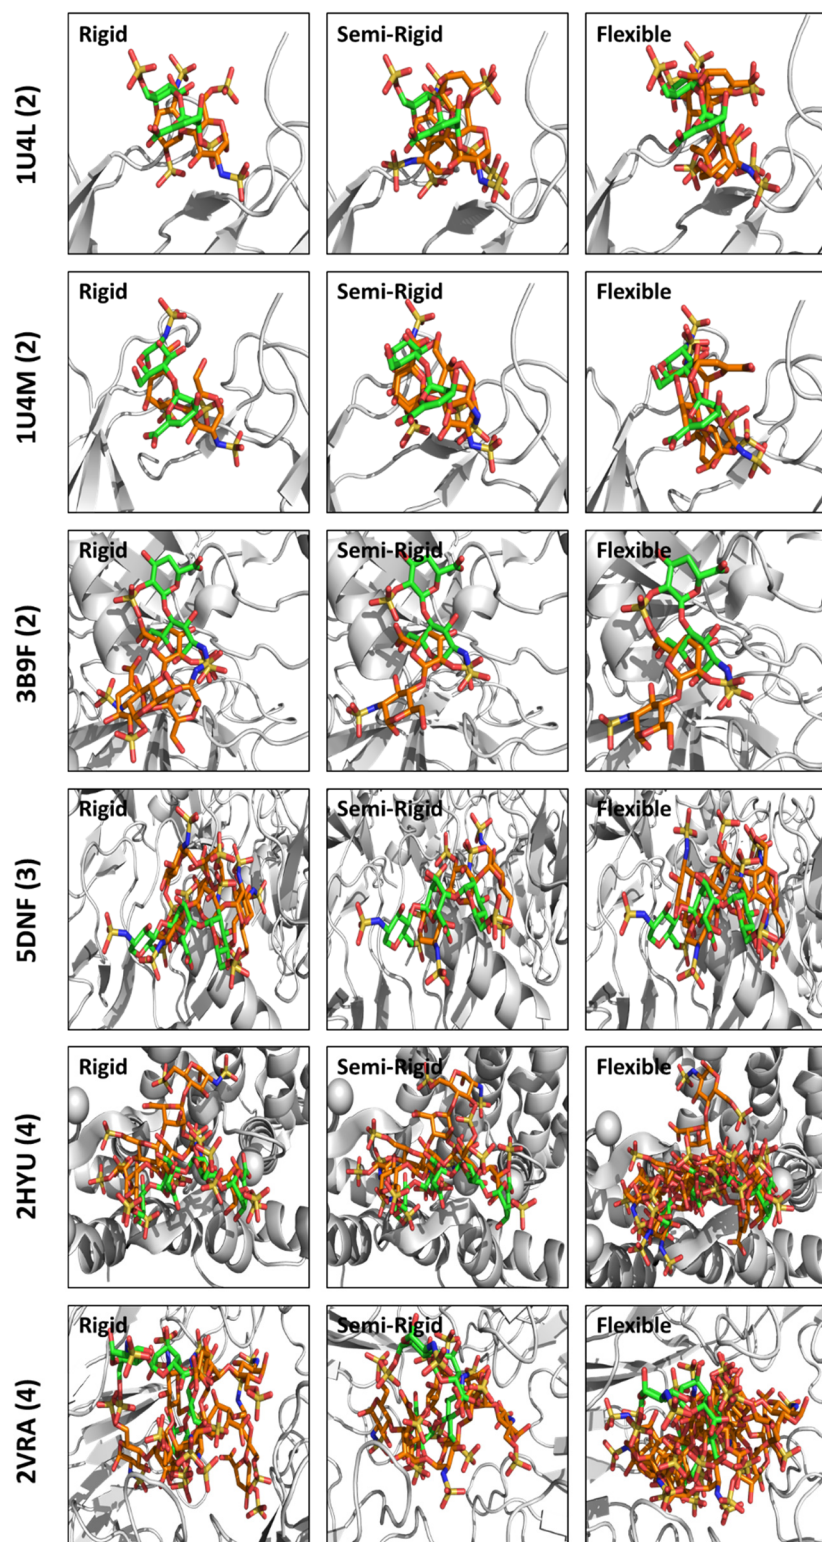

**Figure S20.** Comparison of docked poses using rigid, semi-rigid, and flexible docking protocols to the native pose observed in the co-crystal structures of three di-, one tri- and two tetra- saccharides. Redundant poses have been excluded for clarity. Proteins are shown in cartoon representation in grey, the native pose in green, and docked poses in orange. Models were generated in PyMOL.

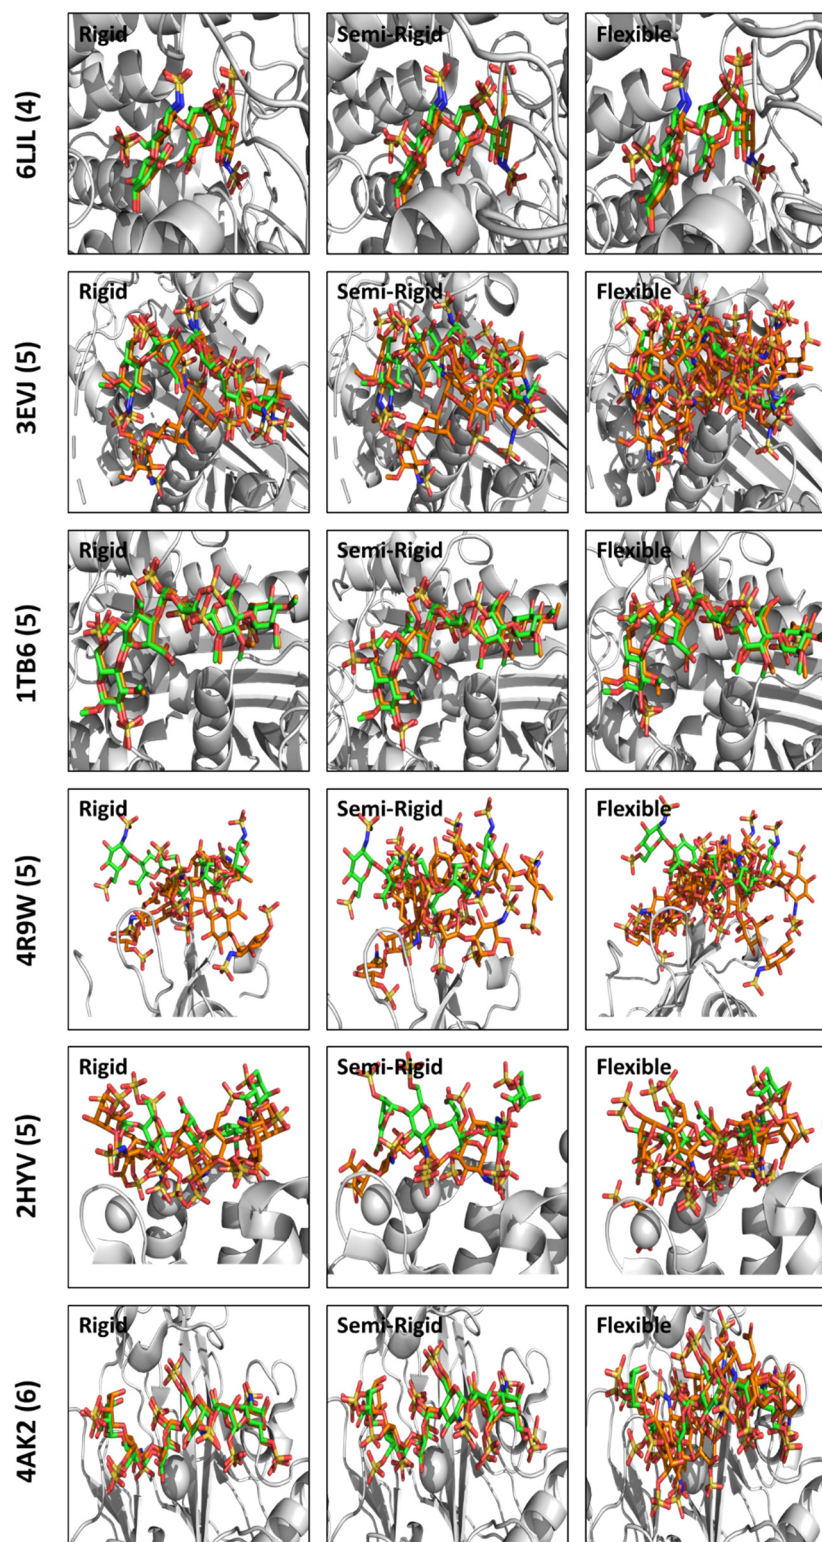

**Figure S21.** Comparison of docked poses using rigid, semi-rigid, and flexible docking protocols to the native pose observed in the co-crystal structures of one tetra-, four penta- and one hexa- saccharides. Redundant poses have been excluded for clarity. Proteins are shown in cartoon representation in grey, the native pose in green, and docked poses in orange. Models were generated in PyMOL.



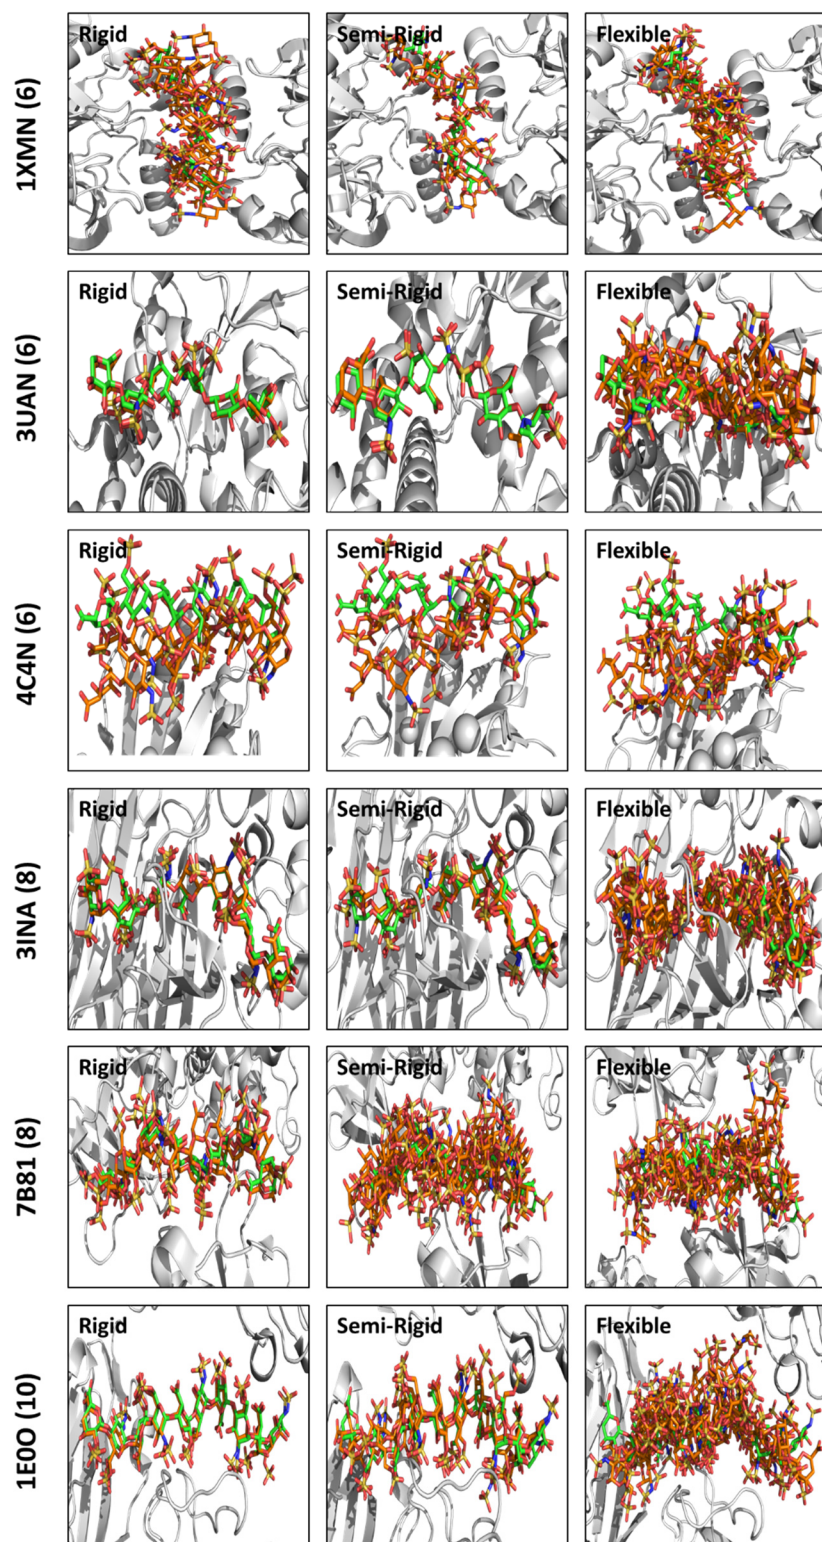

**Figure S22.** Comparison of docked poses using rigid, semi-rigid, and flexible docking protocols to the native pose observed in the co-crystal structures of three hexa-, two octa- and one deca- saccharides. Redundant poses have been excluded for clarity. Proteins are shown in cartoon representation in grey, the native pose in green, and docked poses in orange. Models were generated in PyMOL.
